# Supplementary material for: Evolutionary history of LTR-retrotransposons among 20 Drosophila species
Source: PubMed Central journal article supplement (PMC5408442; doi:10.1186/s13100-017-0090-3), 2017-04-27
Supplement: 13100_2017_90_MOESM2_ESM.pdf [file 13100_2017_90_MOESM2_ESM.pdf]

**Supplementary Table S1:** rebase references (with internal part) for the all drosophila species with their associate superfamily and clade as found in the phylogenetic analyses (figures 1 to 5)

| Reference name | Species             | Superfamily | Clade               |
|----------------|---------------------|-------------|---------------------|
| BEL-1_DAn      | <i>D. ananassae</i> | BEL/Pao     | BEL                 |
| BEL-10_DAn     | <i>D. ananassae</i> | BEL/Pao     | DIVER2              |
| BEL-11_DAn     | <i>D. ananassae</i> | BEL/Pao     | DIVER2              |
| BEL-12_DAn     | <i>D. ananassae</i> | BEL/Pao     | DIVER2              |
| BEL-13_DAn     | <i>D. ananassae</i> | BEL/Pao     | NINJA               |
| BEL-14_DAn     | <i>D. ananassae</i> | BEL/Pao     | BELMONDO2           |
| BEL-15_DAn     | <i>D. ananassae</i> | BEL/Pao     | NINJA               |
| BEL-16_DAn     | <i>D. ananassae</i> | BEL/Pao     | BELMONDO            |
| BEL-17_DAn     | <i>D. ananassae</i> | BEL/Pao     | NINJA               |
| BEL-18_DAn     | <i>D. ananassae</i> | BEL/Pao     | BELMONDO            |
| BEL-19_DAn     | <i>D. ananassae</i> | BEL/Pao     | NINJA               |
| BEL-2_DAn      | <i>D. ananassae</i> | BEL/Pao     | NINJA               |
| BEL-20_DAn     | <i>D. ananassae</i> | BEL/Pao     | NINJA               |
| BEL-21_DAn     | <i>D. ananassae</i> | BEL/Pao     | ROO/ROOA            |
| BEL-22_DAn     | <i>D. ananassae</i> | BEL/Pao     | ROO/ROOA            |
| BEL-3_DAn      | <i>D. ananassae</i> | BEL/Pao     | NINJA               |
| BEL-4_DAn      | <i>D. ananassae</i> | BEL/Pao     | BELMONDO            |
| BEL-5_DAn      | <i>D. ananassae</i> | BEL/Pao     | BEL                 |
| BEL-6_DAn      | <i>D. ananassae</i> | BEL/Pao     | BELMONDO            |
| BEL-7_DAn      | <i>D. ananassae</i> | BEL/Pao     | NINJA               |
| BEL-8_DAn      | <i>D. ananassae</i> | BEL/Pao     | BATUMI / MAX        |
| BEL-9_DAn      | <i>D. ananassae</i> | BEL/Pao     | BEL                 |
| Copia-1_DAn    | <i>D. ananassae</i> | Ty1/Copia   | COPIA               |
| Copia-2_DAn    | <i>D. ananassae</i> | Ty1/Copia   | 1731                |
| Copia-3_DAn    | <i>D. ananassae</i> | Ty1/Copia   | COPIA               |
| Copia-4_DAn    | <i>D. ananassae</i> | Ty1/Copia   | COPIA               |
| Copia-5_DAn    | <i>D. ananassae</i> | Ty1/Copia   | COPIA               |
| Copia-6_DAn    | <i>D. ananassae</i> | Ty1/Copia   | COPIA2_bis          |
| Copia-7_DAn    | <i>D. ananassae</i> | Ty1/Copia   | Xanthias            |
| Copia-8_DAn    | <i>D. ananassae</i> | Ty1/Copia   | COPIABIS            |
| Gypsy-1_DAn    | <i>D. ananassae</i> | Ty3/Gypsy   | Group 2 – MICROPIA  |
| Gypsy-10_DAn   | <i>D. ananassae</i> | Ty3/Gypsy   | Group 2 – SACCO     |
| Gypsy-11_DAn   | <i>D. ananassae</i> | Ty3/Gypsy   | Group 2 – BLASTOPIA |
| Gypsy-12_DAn   | <i>D. ananassae</i> | Ty3/Gypsy   | Group 3 – CHIMPO    |
| Gypsy-13_DAn   | <i>D. ananassae</i> | Ty3/Gypsy   | Group 3 – GYPSY     |
| Gypsy-14_DAn   | <i>D. ananassae</i> | Ty3/Gypsy   | Group 3 – GYPSY     |
| Gypsy-15_DAn   | <i>D. ananassae</i> | Ty3/Gypsy   | Group 3 – 17.6      |
| Gypsy-16_DAn   | <i>D. ananassae</i> | Ty3/Gypsy   | Group 2 – MDG3      |

|              |                     |           |                     |
|--------------|---------------------|-----------|---------------------|
| Gypsy-17_DAn | <i>D. ananassae</i> | Ty3/Gypsy | Group 1 – OSIRIS    |
| Gypsy-18_DAn | <i>D. ananassae</i> | Ty3/Gypsy | Group 2 – BICA      |
| Gypsy-19_DAn | <i>D. ananassae</i> | Ty3/Gypsy | Group 1 – ISIS      |
| Gypsy-2_DAn  | <i>D. ananassae</i> | Ty3/Gypsy | Group 3 – GYPSY     |
| Gypsy-20_DAn | <i>D. ananassae</i> | Ty3/Gypsy | Group 1 – ISIS-like |
| Gypsy-21_DAn | <i>D. ananassae</i> | Ty3/Gypsy | Group 1 – OSIRIS    |
| Gypsy-22_DAn | <i>D. ananassae</i> | Ty3/Gypsy | Group 2 – MICROPIA  |
| Gypsy-23_DAn | <i>D. ananassae</i> | Ty3/Gypsy | Group 1 – OSVALDO   |
| Gypsy-24_DAn | <i>D. ananassae</i> | Ty3/Gypsy | Group 2 – MDG3      |
| Gypsy-25_DAn | <i>D. ananassae</i> | Ty3/Gypsy | Group 1 – ISIS      |
| Gypsy-26_DAn | <i>D. ananassae</i> | Ty3/Gypsy | Group 3 – 17.6      |
| Gypsy-27_DAn | <i>D. ananassae</i> | Ty3/Gypsy | Group 1 – ISIS-like |
| Gypsy-28_DAn | <i>D. ananassae</i> | Ty3/Gypsy | Group 3 – 412/MDG1  |
| Gypsy-29_DAn | <i>D. ananassae</i> | Ty3/Gypsy | Group 3 – GYPSY     |
| Gypsy-3_DAn  | <i>D. ananassae</i> | Ty3/Gypsy | Group 1 – OSIRIS    |
| Gypsy-30_DAn | <i>D. ananassae</i> | Ty3/Gypsy | Group 3 – GYPSY     |
| Gypsy-31_DAn | <i>D. ananassae</i> | Ty3/Gypsy | Group 1 – OSIRIS    |
| Gypsy-32_DAn | <i>D. ananassae</i> | Ty3/Gypsy | Group 1 – ISIS-like |
| Gypsy-33_DAn | <i>D. ananassae</i> | Ty3/Gypsy | Group 1 – OSIRIS    |
| Gypsy-34_DAn | <i>D. ananassae</i> | Ty3/Gypsy | Group 2 – SACCO     |
| Gypsy-35_DAn | <i>D. ananassae</i> | Ty3/Gypsy | Group 1 – OSIRIS    |
| Gypsy-36_DAn | <i>D. ananassae</i> | Ty3/Gypsy | Group 2 – MICROPIA  |
| Gypsy-37_DAn | <i>D. ananassae</i> | Ty3/Gypsy | Group 1 – OSIRIS    |
| Gypsy-38_DAn | <i>D. ananassae</i> | Ty3/Gypsy | Group 2 – MICROPIA  |
| Gypsy-39_DAn | <i>D. ananassae</i> | Ty3/Gypsy | Group 3 – GYPSY     |
| Gypsy-4_DAn  | <i>D. ananassae</i> | Ty3/Gypsy | Group 1 – OSIRIS    |
| Gypsy-40_DAn | <i>D. ananassae</i> | Ty3/Gypsy | Group 3 – GYPSY     |
| Gypsy-41_DAn | <i>D. ananassae</i> | Ty3/Gypsy | Group 1 – OSIRIS    |
| Gypsy-42_DAn | <i>D. ananassae</i> | Ty3/Gypsy | Group 2 – SACCO     |
| Gypsy-5_DAn  | <i>D. ananassae</i> | Ty3/Gypsy | Group 3 – GYPSY     |
| Gypsy-6_DAn  | <i>D. ananassae</i> | Ty3/Gypsy | Group 2 – BLASTOPIA |
| Gypsy-7_DAn  | <i>D. ananassae</i> | Ty3/Gypsy | Group 3 – CHIMPO    |
| Gypsy-8_DAn  | <i>D. ananassae</i> | Ty3/Gypsy | Group 1 – ISIS-like |
| Gypsy-9_DAn  | <i>D. ananassae</i> | Ty3/Gypsy | Group 1 – OSIRIS    |
| TABOR_DA     | <i>D. ananassae</i> | Ty3/Gypsy | Group 3 – 412/MDG1  |
| TOM_DAn      | <i>D. ananassae</i> | Ty3/Gypsy | Group 3 – 17.6      |
| BEL-1_DBi    | <i>D. biarmipes</i> | BEL/Pao   | BEL                 |
| BEL-2_DBi    | <i>D. biarmipes</i> | BEL/Pao   | BEL                 |
| BEL-3_DBi    | <i>D. biarmipes</i> | BEL/Pao   | BELMONDO2           |
| BEL-4_DBi    | <i>D. biarmipes</i> | BEL/Pao   | DIVER               |
| Copia-1_DBi  | <i>D. biarmipes</i> | Ty1/Copia | COPIA               |
| Gypsy-1_DBi  | <i>D. biarmipes</i> | Ty3/Gypsy | Group 3 – 412/MDG1  |

|              |                       |           |                     |
|--------------|-----------------------|-----------|---------------------|
| Gypsy-11_DBi | <i>D. biarmipes</i>   | Ty3/Gypsy | ? (no pol)          |
| Gypsy-13_DBi | <i>D. biarmipes</i>   | Ty3/Gypsy | Group 2 – BLASTOPIA |
| Gypsy-14_DBi | <i>D. biarmipes</i>   | Ty3/Gypsy | Group 2 – MDG3      |
| Gypsy-15_DBi | <i>D. biarmipes</i>   | Ty3/Gypsy | Group 3 – 17.6      |
| Gypsy-16_DBi | <i>D. biarmipes</i>   | Ty3/Gypsy | Group 1 – ULYSSES   |
| Gypsy-17_DBi | <i>D. biarmipes</i>   | Ty3/Gypsy | Group 3 – GYPSY     |
| Gypsy-2_DBi  | <i>D. biarmipes</i>   | Ty3/Gypsy | Group 2 – SACCO     |
| Gypsy-3_DBi  | <i>D. biarmipes</i>   | Ty3/Gypsy | Group 2 – BLASTOPIA |
| Gypsy-4_DBi  | <i>D. biarmipes</i>   | Ty3/Gypsy | Group 3 – 17.6      |
| Gypsy-5_DBi  | <i>D. biarmipes</i>   | Ty3/Gypsy | Group 2 – MDG3      |
| Gypsy-6_DBi  | <i>D. biarmipes</i>   | Ty3/Gypsy | Group 2 – BICA      |
| Gypsy-7_DBi  | <i>D. biarmipes</i>   | Ty3/Gypsy | Group 3 – GYPSY     |
| Gypsy-8_DBi  | <i>D. biarmipes</i>   | Ty3/Gypsy | Group 2 – MICROPIA  |
| Gypsy-9_DBi  | <i>D. biarmipes</i>   | Ty3/Gypsy | Group 1 – OSVALDO   |
| BEL-1_DBP    | <i>D. bipectinata</i> | BEL/Pao   | DIVER2              |
| BEL-10_DBP   | <i>D. bipectinata</i> | BEL/Pao   | ROO/ROOA            |
| BEL-11_DBP   | <i>D. bipectinata</i> | BEL/Pao   | BELMONDO2           |
| BEL-12_DBP   | <i>D. bipectinata</i> | BEL/Pao   | NINJA               |
| BEL-2_DBP    | <i>D. bipectinata</i> | BEL/Pao   | BEL                 |
| BEL-3_DBP    | <i>D. bipectinata</i> | BEL/Pao   | BELMONDO2           |
| BEL-4_DBP    | <i>D. bipectinata</i> | BEL/Pao   | BEL                 |
| BEL-5_DBP    | <i>D. bipectinata</i> | BEL/Pao   | BATUMI / MAX        |
| BEL-6_DBP    | <i>D. bipectinata</i> | BEL/Pao   | DIVER               |
| BEL-7_DBP    | <i>D. bipectinata</i> | BEL/Pao   | NINJA               |
| BEL-8_DBP    | <i>D. bipectinata</i> | BEL/Pao   | NINJA               |
| BEL-9_DBP    | <i>D. bipectinata</i> | BEL/Pao   | BEL                 |
| Copia-1_DBP  | <i>D. bipectinata</i> | Ty1/Copia | COPIA2/COPIA2_bis   |
| Copia-2_DBP  | <i>D. bipectinata</i> | Ty1/Copia | 1731                |
| Copia-3_DBP  | <i>D. bipectinata</i> | Ty1/Copia | COPIABIS            |
| Gypsy-1_DBP  | <i>D. bipectinata</i> | Ty3/Gypsy | Group 1 – SACCO     |
| Gypsy-10_DBP | <i>D. bipectinata</i> | Ty3/Gypsy | Group 3 – GYPSY     |
| Gypsy-11_DBP | <i>D. bipectinata</i> | Ty3/Gypsy | Group 3 – 412/MDG1  |
| Gypsy-12_DBP | <i>D. bipectinata</i> | Ty3/Gypsy | Group 3 – CHIMPO    |
| Gypsy-13_DBP | <i>D. bipectinata</i> | Ty3/Gypsy | ? (no pol)          |
| Gypsy-14_DBP | <i>D. bipectinata</i> | Ty3/Gypsy | Group 1 – SACCO     |
| Gypsy-15_DBP | <i>D. bipectinata</i> | Ty3/Gypsy | Group 2 – OSIRIS    |
| Copia-1_DBP  | <i>D. bipectinata</i> | Ty3/Gypsy | COPIA2/COPIA2_bis   |
| Gypsy-16_DBP | <i>D. bipectinata</i> | Ty3/Gypsy | ? (too short)       |
| Gypsy-17_DBP | <i>D. bipectinata</i> | Ty3/Gypsy | Group 2 – OSIRIS    |
| Gypsy-18_DBP | <i>D. bipectinata</i> | Ty3/Gypsy | Group 3 – 412/MDG1  |
| Gypsy-19_DBP | <i>D. bipectinata</i> | Ty3/Gypsy | Group 1 – BLASTOPIA |
| Gypsy-2_DBP  | <i>D. bipectinata</i> | Ty3/Gypsy | Group 3 – GYPSY     |

|              |                       |           |                     |
|--------------|-----------------------|-----------|---------------------|
| Gypsy-20_DBp | <i>D. bipectinata</i> | Ty3/Gypsy | Group 3 – 17.6      |
| Gypsy-21_DBp | <i>D. bipectinata</i> | Ty3/Gypsy | Group 2 – ISIS-like |
| Gypsy-22_DBp | <i>D. bipectinata</i> | Ty3/Gypsy | Group 1 – MDG3      |
| Gypsy-23_DBp | <i>D. bipectinata</i> | Ty3/Gypsy | Group 3 – GYPSY     |
| Gypsy-24_DBp | <i>D. bipectinata</i> | Ty3/Gypsy | Group 3 – 17.6      |
| Gypsy-25_DBp | <i>D. bipectinata</i> | Ty3/Gypsy | Group 3             |
| Gypsy-26_DBp | <i>D. bipectinata</i> | Ty3/Gypsy | Group 3 – GYPSY     |
| Gypsy-27_DBp | <i>D. bipectinata</i> | Ty3/Gypsy | Group 2 – ULYSSES   |
| Gypsy-28_DBp | <i>D. bipectinata</i> | Ty3/Gypsy | Group 3 – 412/MDG1  |
| Gypsy-3_DBp  | <i>D. bipectinata</i> | Ty3/Gypsy | Group 1 – BLASTOPIA |
| Gypsy-4_DBp  | <i>D. bipectinata</i> | Ty3/Gypsy | Group 1 – SACCO     |
| Gypsy-5_DBp  | <i>D. bipectinata</i> | Ty3/Gypsy | Group 1 – SACCO     |
| Gypsy-6_DBp  | <i>D. bipectinata</i> | Ty3/Gypsy | Group 1 – MICROPIA  |
| Gypsy-7_DBp  | <i>D. bipectinata</i> | Ty3/Gypsy | Group 2 – OSVALDO   |
| Gypsy-8_DBp  | <i>D. bipectinata</i> | Ty3/Gypsy | Group 2 – ISIS-like |
| Gypsy-9_DBp  | <i>D. bipectinata</i> | Ty3/Gypsy | Group 3 – 17.6      |
| BEL-1_DEI    | <i>D. elegans</i>     | BEL/Pao   | BELMONDO2           |
| BEL-10_DEI   | <i>D. elegans</i>     | BEL/Pao   | BATUMI / MAX        |
| BEL-11_DEI   | <i>D. elegans</i>     | BEL/Pao   | ROO/ROOA            |
| BEL-12_DEI   | <i>D. elegans</i>     | BEL/Pao   | NINJA               |
| BEL-13_DEI   | <i>D. elegans</i>     | BEL/Pao   | BATUMI / MAX        |
| BEL-14_DEI   | <i>D. elegans</i>     | BEL/Pao   | BATUMI / MAX        |
| BEL-15_DEI   | <i>D. elegans</i>     | BEL/Pao   | DIVER2              |
| BEL-16_DEI   | <i>D. elegans</i>     | BEL/Pao   | BELMONDO2           |
| BEL-17_DEI   | <i>D. elegans</i>     | BEL/Pao   | DIVER2              |
| BEL-18_DEI   | <i>D. elegans</i>     | BEL/Pao   | BELMONDO2           |
| BEL-2_DEI    | <i>D. elegans</i>     | BEL/Pao   | BELMONDO2           |
| BEL-3_DEI    | <i>D. elegans</i>     | BEL/Pao   | BEL                 |
| BEL-4_DEI    | <i>D. elegans</i>     | BEL/Pao   | DIVER2              |
| BEL-5_DEI    | <i>D. elegans</i>     | BEL/Pao   | ROO/ROOA            |
| BEL-6_DEI    | <i>D. elegans</i>     | BEL/Pao   | NINJA               |
| BEL-8_DEI    | <i>D. elegans</i>     | BEL/Pao   | BELMONDO            |
| BEL-9_DEI    | <i>D. elegans</i>     | BEL/Pao   | BELMONDO2           |
| Copia-1_DEI  | <i>D. elegans</i>     | Ty1/Copia | COPIABIS            |
| Copia-2_DEI  | <i>D. elegans</i>     | Ty1/Copia | COPIA               |
| Gypsy-1_DEI  | <i>D. elegans</i>     | Ty1/Copia | Group 2 – SACCO     |
| Gypsy-10_DEI | <i>D. elegans</i>     | Ty3/Gypsy | Group 1 – OSVALDO   |
| Gypsy-11_DEI | <i>D. elegans</i>     | Ty3/Gypsy | Group 2 – BLASTOPIA |
| Gypsy-12_DEI | <i>D. elegans</i>     | Ty3/Gypsy | Group 2 – MDG3      |
| Gypsy-13_DEI | <i>D. elegans</i>     | Ty3/Gypsy | Group 2 – MICROPIA  |
| Gypsy-14_DEI | <i>D. elegans</i>     | Ty3/Gypsy | Group 2 – SACCO     |
| Gypsy-15_DEI | <i>D. elegans</i>     | Ty3/Gypsy | Group 3 – 17.6      |

|              |                   |           |                     |
|--------------|-------------------|-----------|---------------------|
| Gypsy-16_DEI | <i>D. elegans</i> | Ty3/Gypsy | Group 3 – 17.6      |
| Gypsy-17_DEI | <i>D. elegans</i> | Ty3/Gypsy | Group 2 – BLASTOPIA |
| Gypsy-18_DEI | <i>D. elegans</i> | Ty3/Gypsy | Group 3 – 412/MDG1  |
| Gypsy-19_DEI | <i>D. elegans</i> | Ty3/Gypsy | ? (no pol)          |
| Gypsy-2_DEI  | <i>D. elegans</i> | Ty3/Gypsy | Group 2 – BLASTOPIA |
| Gypsy-20_DEI | <i>D. elegans</i> | Ty3/Gypsy | Group 3 – GYPSY     |
| Gypsy-21_DEI | <i>D. elegans</i> | Ty3/Gypsy | Group 1 – OSIRIS    |
| Gypsy-22_DEI | <i>D. elegans</i> | Ty3/Gypsy | Group 3 – GYPSY     |
| Gypsy-23_DEI | <i>D. elegans</i> | Ty3/Gypsy | Group 1 – ULYSSES   |
| Gypsy-24_DEI | <i>D. elegans</i> | Ty3/Gypsy | Group 3 – 412/MDG1  |
| Gypsy-25_DEI | <i>D. elegans</i> | Ty3/Gypsy | Group 3 – GYPSY     |
| Gypsy-26_DEI | <i>D. elegans</i> | Ty3/Gypsy | ? (no pol)          |
| Gypsy-27_DEI | <i>D. elegans</i> | Ty3/Gypsy | Group 1 – ULYSSES   |
| Gypsy-28_DEI | <i>D. elegans</i> | Ty3/Gypsy | Group 1 – OSIRIS    |
| Gypsy-29_DEI | <i>D. elegans</i> | Ty3/Gypsy | Group 2 – MICROPIA  |
| Gypsy-3_DEI  | <i>D. elegans</i> | Ty3/Gypsy | Group 1 – OSVALDO   |
| Gypsy-30_DEI | <i>D. elegans</i> | Ty3/Gypsy | Group 2             |
| Gypsy-31_DEI | <i>D. elegans</i> | Ty3/Gypsy | Group 3 – GYPSY     |
| Gypsy-32_DEI | <i>D. elegans</i> | Ty3/Gypsy | Group 3 – GYPSY     |
| Gypsy-33_DEI | <i>D. elegans</i> | Ty3/Gypsy | Group 3 – GYPSY     |
| Gypsy-34_DEI | <i>D. elegans</i> | Ty3/Gypsy | Group 2 – MICROPIA  |
| Gypsy-35_DEI | <i>D. elegans</i> | Ty3/Gypsy | Group 3 – 17.6      |
| Gypsy-36_DEI | <i>D. elegans</i> | Ty3/Gypsy | ? (too short)       |
| Gypsy-37_DEI | <i>D. elegans</i> | Ty3/Gypsy | Group 3 – GYPSY     |
| Gypsy-38_DEI | <i>D. elegans</i> | Ty3/Gypsy | ? (too short)       |
| Gypsy-4_DEI  | <i>D. elegans</i> | Ty3/Gypsy | Group 2 – MDG3      |
| Gypsy-40_DEI | <i>D. elegans</i> | Ty3/Gypsy | ? (too short)       |
| Gypsy-41_DEI | <i>D. elegans</i> | Ty3/Gypsy | Group 3 – 17.6      |
| Gypsy-42_DEI | <i>D. elegans</i> | Ty3/Gypsy | Group 3 – GYPSY     |
| Gypsy-43_DEI | <i>D. elegans</i> | Ty3/Gypsy | Group 2 – BLASTOPIA |
| Gypsy-44_DEI | <i>D. elegans</i> | Ty3/Gypsy | Group 1 – OSIRIS    |
| Gypsy-45_DEI | <i>D. elegans</i> | Ty3/Gypsy | ? (too short)       |
| Gypsy-46_DEI | <i>D. elegans</i> | Ty3/Gypsy | ? (too short)       |
| Gypsy-47_DEI | <i>D. elegans</i> | Ty3/Gypsy | Group 3 – GYPSY     |
| Gypsy-48_DEI | <i>D. elegans</i> | Ty3/Gypsy | Group 2 – SACCO     |
| Gypsy-49_DEI | <i>D. elegans</i> | Ty3/Gypsy | Group 3 – 17.6      |
| Gypsy-5_DEI  | <i>D. elegans</i> | Ty3/Gypsy | Group 1 – OSVALDO   |
| Gypsy-51_DEI | <i>D. elegans</i> | Ty3/Gypsy | Group 1 – OSVALDO   |
| Gypsy-52_DEI | <i>D. elegans</i> | Ty3/Gypsy | ? (to many N)       |
| Gypsy-53_DEI | <i>D. elegans</i> | Ty3/Gypsy | ? (no pol)          |
| Gypsy-54_DEI | <i>D. elegans</i> | Ty3/Gypsy | ? (too short)       |
| Gypsy-55_DEI | <i>D. elegans</i> | Ty3/Gypsy | Group 1 – ISIS      |

|              |                      |           |                     |
|--------------|----------------------|-----------|---------------------|
| Gypsy-57_DEL | <i>D. elegans</i>    | Ty3/Gypsy | Group 3 – CHIMPO    |
| Gypsy-6_DEL  | <i>D. elegans</i>    | Ty3/Gypsy | Group 1 – OSVALDO   |
| Gypsy-7_DEL  | <i>D. elegans</i>    | Ty3/Gypsy | Group 2 – MICROPIA  |
| Gypsy-8_DEL  | <i>D. elegans</i>    | Ty3/Gypsy | Group 2 – BLASTOPIA |
| Gypsy-9_DEL  | <i>D. elegans</i>    | Ty3/Gypsy | Group 2 – MICROPIA  |
| BEL-1_DEre   | <i>D. erecta</i>     | BEL/Pao   | DIVER2              |
| BEL-1_Deu    | <i>D. eugracilis</i> | BEL/Pao   | BATUMI / MAX        |
| BEL-2_Deu    | <i>D. eugracilis</i> | BEL/Pao   | NINJA               |
| BEL-3_Deu    | <i>D. eugracilis</i> | BEL/Pao   | BELMONDO2           |
| BEL-4_DEu    | <i>D. eugracilis</i> | BEL/Pao   | DIVER               |
| BEL-5_DEu    | <i>D. eugracilis</i> | BEL/Pao   | NINJA               |
| Copia-1_Deu  | <i>D. eugracilis</i> | Ty1/Copia | new Xanthias        |
| Copia-2_Deu  | <i>D. eugracilis</i> | Ty1/Copia | 1731                |
| Copia-3_DEu  | <i>D. eugracilis</i> | Ty1/Copia | 1731                |
| Gypsy-1_Deu  | <i>D. eugracilis</i> | Ty3/Gypsy | Group 1 – OSIRIS    |
| Gypsy-10_DEu | <i>D. eugracilis</i> | Ty3/Gypsy | Group 2 – BICA      |
| Gypsy-11_DEu | <i>D. eugracilis</i> | Ty3/Gypsy | Group 2 – BLASTOPIA |
| Gypsy-12_DEu | <i>D. eugracilis</i> | Ty3/Gypsy | Group 3 – 412/MDG1  |
| Gypsy-13_DEu | <i>D. eugracilis</i> | Ty3/Gypsy | Group 1 – OSVALDO   |
| Gypsy-14_DEu | <i>D. eugracilis</i> | Ty3/Gypsy | Group 2 – MDG3      |
| Gypsy-2_Deu  | <i>D. eugracilis</i> | Ty3/Gypsy | Group 2 – SACCO     |
| Gypsy-3_Deu  | <i>D. eugracilis</i> | Ty3/Gypsy | Group 2 – SACCO     |
| Gypsy-4_Deu  | <i>D. eugracilis</i> | Ty3/Gypsy | Group 3 – 17.6      |
| Gypsy-5_Deu  | <i>D. eugracilis</i> | Ty3/Gypsy | Group 2 – BLASTOPIA |
| Gypsy-6_DEu  | <i>D. eugracilis</i> | Ty3/Gypsy | Group 3 – GYPSY     |
| Gypsy-7_DEu  | <i>D. eugracilis</i> | Ty3/Gypsy | Group 3 – GYPSY     |
| Gypsy-8_DEu  | <i>D. eugracilis</i> | Ty3/Gypsy | Group 1 – OSVALDO   |
| Gypsy-9_DEu  | <i>D. eugracilis</i> | Ty3/Gypsy | Group 2 – SACCO     |
| BEL-1_DFi    | <i>D. ficusphila</i> | BEL/Pao   | BELMONDO2           |
| BEL-2_DFi    | <i>D. ficusphila</i> | BEL/Pao   | DIVER2              |
| BEL-3_DFi    | <i>D. ficusphila</i> | BEL/Pao   | DIVER2              |
| BEL-4_DFi    | <i>D. ficusphila</i> | BEL/Pao   | DIVER2              |
| BEL-5_DFi    | <i>D. ficusphila</i> | BEL/Pao   | ROO/ROOA            |
| Copia-1_DFi  | <i>D. ficusphila</i> | Ty1/Copia | 1731                |
| Gypsy-1_DFi  | <i>D. ficusphila</i> | Ty3/Gypsy | Group 1 – OSIRIS    |
| Gypsy-10_DFi | <i>D. ficusphila</i> | Ty3/Gypsy | Group 2 – BLASTOPIA |
| Gypsy-11_DFi | <i>D. ficusphila</i> | Ty3/Gypsy | Group 2 – BLASTOPIA |
| Gypsy-12_DFi | <i>D. ficusphila</i> | Ty3/Gypsy | Group 2 – BLASTOPIA |
| Gypsy-13_DFi | <i>D. ficusphila</i> | Ty3/Gypsy | Group 2 – SACCO     |
| Gypsy-14_DFi | <i>D. ficusphila</i> | Ty3/Gypsy | Group 1             |
| Gypsy-2_DFi  | <i>D. ficusphila</i> | Ty3/Gypsy | Group 2 – BLASTOPIA |
| Gypsy-3_DFi  | <i>D. ficusphila</i> | Ty3/Gypsy | ? (too short)       |

|                            |                        |           |                     |
|----------------------------|------------------------|-----------|---------------------|
| Gypsy-4_DFi                | <i>D. ficusphila</i>   | Ty3/Gypsy | Group 2 – BLASTOPIA |
| Gypsy-5_DFi                | <i>D. ficusphila</i>   | Ty3/Gypsy | Group 2 – MDG3      |
| Gypsy-6_DFi                | <i>D. ficusphila</i>   | Ty3/Gypsy | Group 2 – BICA      |
| Gypsy-7_DFi                | <i>D. ficusphila</i>   | Ty3/Gypsy | Group 3 – GYPSY     |
| Gypsy-8_DFi                | <i>D. ficusphila</i>   | Ty3/Gypsy | Group 2 – MDG3      |
| Gypsy-9_DFi                | <i>D. ficusphila</i>   | Ty3/Gypsy | Group 2 – MICROPIA  |
| BEL-1_DGri                 | <i>D. grimshawi</i>    | BEL/Pao   | ROO/ROOA            |
| BEL-2_DGri                 | <i>D. grimshawi</i>    | BEL/Pao   | BELMONDO            |
| BEL-3_DGri                 | <i>D. grimshawi</i>    | BEL/Pao   | BELMONDO2           |
| Copia-1_DGri               | <i>D. grimshawi</i>    | Ty1/Copia | COPIABIS            |
| Copia-2_DGri               | <i>D. grimshawi</i>    | Ty1/Copia | COPIABIS            |
| Copia-3_DGri               | <i>D. grimshawi</i>    | Ty1/Copia | COPIA2/COPIA2_bis   |
| Copia-4_DGri               | <i>D. grimshawi</i>    | Ty1/Copia | Outgroup            |
| Gypsy_DG                   | <i>D. grimshawi</i>    | Ty3/Gypsy | Group 3             |
| Gypsy-1_DG                 | <i>D. grimshawi</i>    | Ty3/Gypsy | Group 1 – OSVALDO   |
| Gypsy-1_DGri               | <i>D. grimshawi</i>    | Ty3/Gypsy | Group 1 – ISIS-like |
| Gypsy-2_DGri               | <i>D. grimshawi</i>    | Ty3/Gypsy | Group 1 – ISIS      |
| Gypsy-3_DGri               | <i>D. grimshawi</i>    | Ty3/Gypsy | Group 3 – 17.6      |
| Gypsy-4_DGri               | <i>D. grimshawi</i>    | Ty3/Gypsy | Group 1 – ULYSSES   |
| Gypsy-5_DGri               | <i>D. grimshawi</i>    | Ty3/Gypsy | Group 3 – GYPSY     |
| Gypsy-6_DGri               | <i>D. grimshawi</i>    | Ty3/Gypsy | Group 1 – OSIRIS    |
| BEL-1_DKi                  | <i>D. kikkawai</i>     | BEL/Pao   | NINJA               |
| Copia-2_DKi                | <i>D. kikkawai</i>     | Ty1/Copia | COPIA/COPIABIS      |
| Gypsy-1_DKi                | <i>D. kikkawai</i>     | Ty3/Gypsy | Group 2 – BLASTOPIA |
| Gypsy-2_DKi                | <i>D. kikkawai</i>     | Ty3/Gypsy | Group 2 – MDG3      |
| Gypsy-3_DKi                | <i>D. kikkawai</i>     | Ty3/Gypsy | Group 3             |
| Gypsy-4_DKi                | <i>D. kikkawai</i>     | Ty3/Gypsy | Group 3 – CHIMPO    |
| Gypsy-5_DKi                | <i>D. kikkawai</i>     | Ty3/Gypsy | Group 2 – MDG3      |
| ACCORD_Dmel                | <i>D. melanogaster</i> | Ty3/Gypsy | Group 3 – 17.6      |
| ACCORD2_Dmel               | <i>D. melanogaster</i> | Ty3/Gypsy | Group 3 – 17.6      |
| BATUMI_Dmel                | <i>D. melanogaster</i> | BEL/Pao   | BATUMI / MAX        |
| BEL_DMel                   | <i>D. melanogaster</i> | BEL/Pao   | BEL                 |
| Bica_Dmel                  | <i>D. melanogaster</i> | Ty3/Gypsy | Group 2 – BICA      |
| BLASTOPIA_Dmel             | <i>D. melanogaster</i> | Ty3/Gypsy | Group 2 – BLASTOPIA |
| BLOOD_Dmel                 | <i>D. melanogaster</i> | Ty3/Gypsy | Group 3 – 412/MDG1  |
| BURDOCK_Dmel               | <i>D. melanogaster</i> | Ty3/Gypsy | Group 3 – GYPSY     |
| Chimpo_Dmel                | <i>D. melanogaster</i> | Ty3/Gypsy | Group 3 – CHIMPO    |
| Chouto_Dmel                | <i>D. melanogaster</i> | Ty3/Gypsy | Group 3 – GYPSY     |
| COPIA_Dmel                 | <i>D. melanogaster</i> | Ty1/Copia | COPIA               |
| Copia-1_DM = Xanthias_Dmel | <i>D. melanogaster</i> | Ty1/Copia | Xanthias            |
| COPIA2_Dmel                | <i>D. melanogaster</i> | Ty1/Copia | COPIA2              |
| DIVER_DMel                 | <i>D. melanogaster</i> | BEL/Pao   | DIVER               |

|                 |                        |           |                    |
|-----------------|------------------------|-----------|--------------------|
| DIVER2_DMel     | <i>D. melanogaster</i> | BEL/Pao   | DIVER2             |
| DM1731_DMel     | <i>D. melanogaster</i> | Ty1/Copia | 1731               |
| DM176_Dmel      | <i>D. melanogaster</i> | Ty3/Gypsy | Group 3 – 17.6     |
| DM297_Dmel      | <i>D. melanogaster</i> | Ty3/Gypsy | Group 3 – 17.6     |
| DM412_Dmel      | <i>D. melanogaster</i> | Ty3/Gypsy | Group 3 – 412/MDG1 |
| FROGGER_Dmel    | <i>D. melanogaster</i> | Ty3/Gypsy | Xanthias           |
| GTWIN_Dmel      | <i>D. melanogaster</i> | Ty3/Gypsy | Group 3 – GYPSY    |
| GYPSY_Dmel      | <i>D. melanogaster</i> | Ty3/Gypsy | Group 3 – GYPSY    |
| Gypsy1_DM       | <i>D. melanogaster</i> | Ty3/Gypsy | Group 3 – GYPSY    |
| GYPSY10         | <i>D. melanogaster</i> | Ty3/Gypsy | ? (no pol)         |
| GYPSY11         | <i>D. melanogaster</i> | Ty3/Gypsy | ? (no pol)         |
| GYPSY12_Dmel    | <i>D. melanogaster</i> | Ty3/Gypsy | Group 1 – OSIRIS   |
| GYPSY2_Dmel     | <i>D. melanogaster</i> | Ty3/Gypsy | Group 3 – GYPSY    |
| Gypsy2_DM       | <i>D. melanogaster</i> | Ty3/Gypsy | Group 3 – GYPSY    |
| GYPSY3_Dmel     | <i>D. melanogaster</i> | Ty3/Gypsy | Group 3 – GYPSY    |
| GYPSY4_Dmel     | <i>D. melanogaster</i> | Ty3/Gypsy | Group 3 – GYPSY    |
| GYPSY5_Dmel     | <i>D. melanogaster</i> | Ty3/Gypsy | Group 3 – 17.6     |
| GYPSY6_Dmel     | <i>D. melanogaster</i> | Ty3/Gypsy | Group 3 – GYPSY    |
| GYPSY7          | <i>D. melanogaster</i> | Ty3/Gypsy | ? (no pol)         |
| GYPSY8          | <i>D. melanogaster</i> | Ty3/Gypsy | ? (no pol)         |
| GYPSY9          | <i>D. melanogaster</i> | Ty3/Gypsy | ? (no pol)         |
| HMSBEAGLE_Dmel  | <i>D. melanogaster</i> | Ty3/Gypsy | Group 3 – GYPSY    |
| IDEFIX_Dmel     | <i>D. melanogaster</i> | Ty3/Gypsy | Group 3 – 17.6     |
| INVADER1_Dmel   | <i>D. melanogaster</i> | Ty3/Gypsy | Group 2 – MICROPIA |
| INVADER2_Dmel   | <i>D. melanogaster</i> | Ty3/Gypsy | Group 2 – MDG3     |
| INVADER3_Dmel   | <i>D. melanogaster</i> | Ty3/Gypsy | Group 2 – MDG3     |
| INVADER4_Dmel   | <i>D. melanogaster</i> | Ty3/Gypsy | ? (no pol)         |
| INVADER5_Dmel   | <i>D. melanogaster</i> | Ty3/Gypsy | ? (no pol)         |
| INVADER6_Dmel   | <i>D. melanogaster</i> | Ty3/Gypsy | Group 1 – MICROPIA |
| MAX_DMel        | <i>D. melanogaster</i> | BEL/Pao   | BATUMI / MAX       |
| MDG1_Dmel       | <i>D. melanogaster</i> | Ty3/Gypsy | Group 3 – 412/MDG1 |
| MDG3_Dmel       | <i>D. melanogaster</i> | Ty3/Gypsy | Group 2 – MDG3     |
| MICROPIA_Dmel   | <i>D. melanogaster</i> | Ty3/Gypsy | Group 2 – MICROPIA |
| NOMAD_Dmel      | <i>D. melanogaster</i> | Ty3/Gypsy | Group 3 – GYPSY    |
| QUASIMODO_Dmel  | <i>D. melanogaster</i> | Ty3/Gypsy | Group 3 – 17.6     |
| QUASIMODO2_Dmel | <i>D. melanogaster</i> | Ty3/Gypsy | Group 3 – 17.6     |
| ROO_DMel        | <i>D. melanogaster</i> | BEL/Pao   | ROO/ROOA           |
| ROOA_DMel       | <i>D. melanogaster</i> | BEL/Pao   | ROO/ROOA           |
| ROVER_DM        | <i>D. melanogaster</i> | Ty3/Gypsy | Group 3 – 17.6     |
| STALKER2_Dmel   | <i>D. melanogaster</i> | Ty3/Gypsy | Group 3 – 412/MDG1 |
| STALKER4_Dmel   | <i>D. melanogaster</i> | Ty3/Gypsy | Group 3 – 412/MDG1 |
| TABOR_Dmel      | <i>D. melanogaster</i> | Ty3/Gypsy | Group 3 – 412/MDG1 |



|               |                        |           |                    |
|---------------|------------------------|-----------|--------------------|
| TIRANT_Dmel   | <i>D. melanogaster</i> | Ty3/Gypsy | Group 3 – 17.6     |
| TRANSPAC_Dmel | <i>D. melanogaster</i> | Ty3/Gypsy | Group 3 – 17.6     |
| ZAM_Dmel      | <i>D. melanogaster</i> | Ty3/Gypsy | Group 3 – 17.6     |
| BEL-3_DMoj    | <i>D. mojavensis</i>   | BEL/Pao   | BELMONDO           |
| BEL-4_DMoj    | <i>D. mojavensis</i>   | BEL/Pao   | ROO/ROOA           |
| BEL-5_DMoj    | <i>D. mojavensis</i>   | BEL/Pao   | BELMONDO2          |
| BEL-6_DMoj    | <i>D. mojavensis</i>   | BEL/Pao   | DIVER2             |
| BEL-7_DMoj    | <i>D. mojavensis</i>   | BEL/Pao   | NINJA              |
| BEL-8_DMoj    | <i>D. mojavensis</i>   | BEL/Pao   | ROO/ROOA           |
| BEL1_DMoj     | <i>D. mojavensis</i>   | BEL/Pao   | BELMONDO2          |
| BEL2_DMoj     | <i>D. mojavensis</i>   | BEL/Pao   | DIVER2             |
| BEL3_DMoj     | <i>D. mojavensis</i>   | BEL/Pao   | BATUMI / MAX       |
| Copia-3_DMoj  | <i>D. mojavensis</i>   | Ty1/Copia | 1731               |
| Copia-4_DMoj  | <i>D. mojavensis</i>   | Ty1/Copia | COPIA              |
| Copia1_DMoj   | <i>D. mojavensis</i>   | Ty1/Copia | outsider           |
| Copia2_DMoj   | <i>D. mojavensis</i>   | Ty1/Copia | COPIA              |
| Gypsy-10_DMoj | <i>D. mojavensis</i>   | Ty3/Gypsy | Group 3 – GYPSY    |
| Gypsy-8_DMoj  | <i>D. mojavensis</i>   | Ty3/Gypsy | Group 3 – 17.6     |
| Gypsy-9_DMoj  | <i>D. mojavensis</i>   | Ty3/Gypsy | Group 1 – OSVALDO  |
| Gypsy1_DMoj   | <i>D. mojavensis</i>   | Ty3/Gypsy | Group 1 – OSVALDO  |
| Gypsy2_DMoj   | <i>D. mojavensis</i>   | Ty3/Gypsy | Group 2 – MDG3     |
| Gypsy3_DMoj   | <i>D. mojavensis</i>   | Ty3/Gypsy | Group 2 – SACCO    |
| Gypsy4_DMoj   | <i>D. mojavensis</i>   | Ty3/Gypsy | Group 1 – OSVALDO  |
| Gypsy5_DMoj   | <i>D. mojavensis</i>   | Ty3/Gypsy | Group 2 – MICROPIA |
| Gypsy6_DMoj   | <i>D. mojavensis</i>   | Ty3/Gypsy | Group 1 – OSVALDO  |
| Gypsy7_DMoj   | <i>D. mojavensis</i>   | Ty3/Gypsy | Group 3 – 17.6     |
| BEL-1_DPer    | <i>D. persimilis</i>   | BEL/Pao   | BATUMI / MAX       |
| BEL-13_DP     | <i>D. persimilis</i>   | BEL/Pao   | DIVER2             |
| BEL-14_DP     | <i>D. persimilis</i>   | BEL/Pao   | DIVER2             |
| BEL-15_DP     | <i>D. persimilis</i>   | BEL/Pao   | BELMONDO2          |
| BEL-2_DPer    | <i>D. persimilis</i>   | BEL/Pao   | BEL                |
| BEL-3_DPer    | <i>D. persimilis</i>   | BEL/Pao   | DIVER2             |
| BEL-4_DPer    | <i>D. persimilis</i>   | BEL/Pao   | ROO/ROOA           |
| BEL-5_DPer    | <i>D. persimilis</i>   | BEL/Pao   | DIVER2             |
| BEL-6_DPe     | <i>D. persimilis</i>   | BEL/Pao   | BELMONDO2          |
| BEL-6_DPer    | <i>D. persimilis</i>   | BEL/Pao   | DIVER              |
| BEL-7_DPe     | <i>D. persimilis</i>   | BEL/Pao   | BELMONDO           |
| BEL-7_DPer    | <i>D. persimilis</i>   | BEL/Pao   | NINJA              |
| BEL-8_DPe     | <i>D. persimilis</i>   | BEL/Pao   | BELMONDO2          |
| Nobel_DPer    | <i>D. persimilis</i>   | BEL/Pao   | BELMONDO2          |
| Copia-1_DPer  | <i>D. persimilis</i>   | Ty1/Copia | COPIA              |
| Copia-2_DPer  | <i>D. persimilis</i>   | Ty1/Copia | 1731               |

|               |                         |           |                                |
|---------------|-------------------------|-----------|--------------------------------|
| Copia-29_DP   | <i>D. persimilis</i>    | Ty1/Copia | Xanthias                       |
| Gypsy-1_DPer  | <i>D. persimilis</i>    | Ty3/Gypsy | Group 1 – ISIS                 |
| Gypsy-10_DPer | <i>D. persimilis</i>    | Ty3/Gypsy | Group 1 – OSVALDO              |
| Gypsy-11_DPer | <i>D. persimilis</i>    | Ty3/Gypsy | Group 1 – OSVALDO              |
| Gypsy-12_DPer | <i>D. persimilis</i>    | Ty3/Gypsy | Group 1 – OSVALDO              |
| Gypsy-2_DPer  | <i>D. persimilis</i>    | Ty3/Gypsy | Group 2 – SACCO                |
| Gypsy-25_DP   | <i>D. persimilis</i>    | Ty3/Gypsy | Group 1 – ISIS-like            |
| Gypsy-26_DP   | <i>D. persimilis</i>    | Ty3/Gypsy | Group 1 – ISIS-like            |
| Gypsy-27_DP   | <i>D. persimilis</i>    | Ty3/Gypsy | Group 2 – MDG3                 |
| Gypsy-3_DPer  | <i>D. persimilis</i>    | Ty3/Gypsy | Group 1 – OSIRIS               |
| Gypsy-31_DP   | <i>D. persimilis</i>    | Ty3/Gypsy | Group 1 – ISIS-like            |
| Gypsy-32_DP   | <i>D. persimilis</i>    | Ty3/Gypsy | Group 1 – ULYSSE               |
| Gypsy-4_Dper  | <i>D. persimilis</i>    | Ty3/Gypsy | ? (no pol)                     |
| Gypsy-5_DPer  | <i>D. persimilis</i>    | Ty3/Gypsy | Group 2 – MDG3                 |
| Gypsy-6_DPer  | <i>D. persimilis</i>    | Ty3/Gypsy | Group 1 – OSIRIS               |
| Gypsy-7_DPer  | <i>D. persimilis</i>    | Ty3/Gypsy | Group 1 – OSVALDO              |
| Gypsy-8_DPer  | <i>D. persimilis</i>    | Ty3/Gypsy | Group 1 – OSIRIS               |
| Gypsy-9_DPer  | <i>D. persimilis</i>    | Ty3/Gypsy | Group 1 – OSVALDO              |
| BEL-4_DPse    | <i>D. pseudoobscura</i> | BEL/Pao   | BELMONDO2                      |
| BEL1_Dpse     | <i>D. pseudoobscura</i> | BEL/Pao   | NINJA                          |
| BEL2_Dpse     | <i>D. pseudoobscura</i> | BEL/Pao   | BELMONDO                       |
| BEL3_DPse     | <i>D. pseudoobscura</i> | BEL/Pao   | BELMONDO2                      |
| Copia1_DPse   | <i>D. pseudoobscura</i> | Ty1/Copia | Xanthias                       |
| Copia2_DPse   | <i>D. pseudoobscura</i> | Ty1/Copia | COPIA2/COPIA2_bis/New Xanthias |
| Gypsy-25_DPse | <i>D. pseudoobscura</i> | Ty3/Gypsy | Group 1 – ISIS-like            |
| Gypsy-26_DPse | <i>D. pseudoobscura</i> | Ty3/Gypsy | Group 3 – 412/MDG1             |
| Gypsy1_DPse   | <i>D. pseudoobscura</i> | Ty3/Gypsy | ? (no pol)                     |
| Gypsy10_DPse  | <i>D. pseudoobscura</i> | Ty3/Gypsy | Group 3 – GYPSY                |
| Gypsy11_DPse  | <i>D. pseudoobscura</i> | Ty3/Gypsy | Group 1 – OSVALDO              |
| Gypsy12_DPse  | <i>D. pseudoobscura</i> | Ty3/Gypsy | Group 3 – GYPSY                |
| Gypsy13_DPse  | <i>D. pseudoobscura</i> | Ty3/Gypsy | Group 1 – OSIRIS               |
| Gypsy14_DPse  | <i>D. pseudoobscura</i> | Ty3/Gypsy | Group 2 – BLASTOPIA            |
| Gypsy15_DPse  | <i>D. pseudoobscura</i> | Ty3/Gypsy | Group 1 – OSIRIS               |
| Gypsy16_DPse  | <i>D. pseudoobscura</i> | Ty3/Gypsy | Group 1 – ISIS-like            |
| Gypsy17_DPse  | <i>D. pseudoobscura</i> | Ty3/Gypsy | Group 3 – 17.6                 |
| Gypsy18_DPse  | <i>D. pseudoobscura</i> | Ty3/Gypsy | Group 2 – BLASTOPIA            |
| Gypsy19_DPse  | <i>D. pseudoobscura</i> | Ty3/Gypsy | Group 2 – MDG3                 |
| Gypsy2_DPse   | <i>D. pseudoobscura</i> | Ty3/Gypsy | Group 2 – BLASTOPIA            |
| Gypsy20_DPse  | <i>D. pseudoobscura</i> | Ty3/Gypsy | Group 2 – BLASTOPIA            |
| Gypsy21_DPse  | <i>D. pseudoobscura</i> | Ty3/Gypsy | Group 2 – BLASTOPIA            |
| Gypsy22_DPse  | <i>D. pseudoobscura</i> | Ty3/Gypsy | Group 2 – MDG3                 |

|              |                         |           |                     |
|--------------|-------------------------|-----------|---------------------|
| Gypsy23_Dpse | <i>D. pseudoobscura</i> | Ty3/Gypsy | Group 1 – OSIRIS    |
| Gypsy24_Dpse | <i>D. pseudoobscura</i> | Ty3/Gypsy | Group 1 – ULYSSES   |
| Gypsy3_Dpse  | <i>D. pseudoobscura</i> | Ty3/Gypsy | Group 1 – ULYSSES   |
| Gypsy4_Dpse  | <i>D. pseudoobscura</i> | Ty3/Gypsy | Group 1 – OSIRIS    |
| Gypsy5_Dpse  | <i>D. pseudoobscura</i> | Ty3/Gypsy | Group 1 – OSIRIS    |
| Gypsy6_Dpse  | <i>D. pseudoobscura</i> | Ty3/Gypsy | Group 3 – GYPSY     |
| Gypsy7_Dpse  | <i>D. pseudoobscura</i> | Ty3/Gypsy | Group 1 – OSIRIS    |
| Gypsy8_Dpse  | <i>D. pseudoobscura</i> | Ty3/Gypsy | Group 1 – OSVALDO   |
| Gypsy9_Dpse  | <i>D. pseudoobscura</i> | Ty3/Gypsy | Group 1 – OSVALDO   |
| BEL-1_DRh    | <i>D. rhopaloa</i>      | BEL/Pao   | DIVER2              |
| BEL-2_DRh    | <i>D. rhopaloa</i>      | BEL/Pao   | DIVER2              |
| BEL-3_DRh    | <i>D. rhopaloa</i>      | BEL/Pao   | NINJA               |
| BEL-4_DRh    | <i>D. rhopaloa</i>      | BEL/Pao   | DIVER               |
| BEL-5_DRh    | <i>D. rhopaloa</i>      | BEL/Pao   | BEL                 |
| BEL-6_DRh    | <i>D. rhopaloa</i>      | BEL/Pao   | DIVER2              |
| BEL-7_DRh    | <i>D. rhopaloa</i>      | BEL/Pao   | BELMONDO            |
| Gypsy-1_DRh  | <i>D. rhopaloa</i>      | Ty3/Gypsy | Group 2 – BLASTOPIA |
| Gypsy-10_DRh | <i>D. rhopaloa</i>      | Ty3/Gypsy | Group 1 – OSVALDO   |
| Gypsy-11_DRh | <i>D. rhopaloa</i>      | Ty3/Gypsy | Group 1 – OSVALDO   |
| Gypsy-12_DRh | <i>D. rhopaloa</i>      | Ty3/Gypsy | Group 1 – OSVALDO   |
| Gypsy-13_DRh | <i>D. rhopaloa</i>      | Ty3/Gypsy | Group 3 – GYPSY     |
| Gypsy-14_DRh | <i>D. rhopaloa</i>      | Ty3/Gypsy | Group 1 – OSVALDO   |
| Gypsy-15_DRh | <i>D. rhopaloa</i>      | Ty3/Gypsy | Group 1 – OSVALDO   |
| Gypsy-16_DRh | <i>D. rhopaloa</i>      | Ty3/Gypsy | Group 2 – BLASTOPIA |
| Gypsy-17_DRh | <i>D. rhopaloa</i>      | Ty3/Gypsy | Group 1             |
| Gypsy-2_DRh  | <i>D. rhopaloa</i>      | Ty3/Gypsy | Group 2 – MDG3      |
| Gypsy-3_DRh  | <i>D. rhopaloa</i>      | Ty3/Gypsy | Group 1 – ULYSSES   |
| Gypsy-4_DRh  | <i>D. rhopaloa</i>      | Ty3/Gypsy | Group 3 – 17.6      |
| Gypsy-5_DRh  | <i>D. rhopaloa</i>      | Ty3/Gypsy | Group 2 – BLASTOPIA |
| Gypsy-6_DRh  | <i>D. rhopaloa</i>      | Ty3/Gypsy | Group 2 – BLASTOPIA |
| Gypsy-7_DRh  | <i>D. rhopaloa</i>      | Ty3/Gypsy | Group 1 – OSVALDO   |
| Gypsy-8_DRh  | <i>D. rhopaloa</i>      | Ty3/Gypsy | Group 1 – OSVALDO   |
| Gypsy-9_DRh  | <i>D. rhopaloa</i>      | Ty3/Gypsy | Group 1 – OSVALDO   |
| BEL-2_DSe    | <i>D. sechellia</i>     | BEL/Pao   | NINJA               |
| Copia-1_DSe  | <i>D. sechellia</i>     | Ty1/Copia | COPIA2_bis          |
| Gypsy-1_DSe  | <i>D. sechellia</i>     | Ty3/Gypsy | Group 3 – GYPSY     |
| Gypsy-2_DSe  | <i>D. sechellia</i>     | Ty3/Gypsy | Group 3 – GYPSY     |
| Gypsy-3_DSe  | <i>D. sechellia</i>     | Ty3/Gypsy | Group 3 – GYPSY     |
| Gypsy-4_DSe  | <i>D. sechellia</i>     | Ty3/Gypsy | Group 2 – MICROPIA  |
| Gypsy-5_DSe  | <i>D. sechellia</i>     | Ty3/Gypsy | Group 3 – 17.6      |
| Gypsy-6_DSe  | <i>D. sechellia</i>     | Ty3/Gypsy | Group 2 – BLASTOPIA |
| Gypsy-7_DSe  | <i>D. sechellia</i>     | Ty3/Gypsy | Group 2 – MICROPIA  |

|               |                      |           |                    |
|---------------|----------------------|-----------|--------------------|
| Gypsy-8_DSe   | <i>D. sechellia</i>  | Ty3/Gypsy | Group 3 – 17.6     |
| Copia-1_DSim  | <i>D. simulans</i>   | Ty1/Copia | COPIA2_bis         |
| Gypsy-1_DSim  | <i>D. simulans</i>   | Ty3/Gypsy | Group 3 – GYPSY    |
| Gypsy-10_DSim | <i>D. simulans</i>   | Ty3/Gypsy | Group 3 – GYPSY    |
| Gypsy-11_DSim | <i>D. simulans</i>   | Ty3/Gypsy | Group 3 – GYPSY    |
| Gypsy-12_DSim | <i>D. simulans</i>   | Ty3/Gypsy | Group 3 – 17.6     |
| Gypsy-13_DSim | <i>D. simulans</i>   | Ty3/Gypsy | Group 1 – OSVALDO  |
| Gypsy-2_DSim  | <i>D. simulans</i>   | Ty3/Gypsy | Group 2 – MICROPIA |
| Gypsy-3_DSim  | <i>D. simulans</i>   | Ty3/Gypsy | Group 2 – SACCO    |
| Gypsy-4_DSim  | <i>D. simulans</i>   | Ty3/Gypsy | Group 3 – 17.6     |
| Gypsy-5_DSim  | <i>D. simulans</i>   | Ty3/Gypsy | Group 3 – 17.6     |
| Gypsy-6_DSim  | <i>D. simulans</i>   | Ty3/Gypsy | Group 3 – 17.6     |
| Gypsy-7_DSim  | <i>D. simulans</i>   | Ty3/Gypsy | ? (too short)      |
| Gypsy-8_DSim  | <i>D. simulans</i>   | Ty3/Gypsy | Group 3 – 412/MDG1 |
| Gypsy-9_DSim  | <i>D. simulans</i>   | Ty3/Gypsy | ? (no pol)         |
| NINJA_DSim    | <i>D. simulans</i>   | BEL/Pao   | NINJA              |
| BEL-1_DTa     | <i>D. takahashi</i>  | BEL/Pao   | NINJA              |
| BEL-10_DTa    | <i>D. takahashi</i>  | BEL/Pao   | BELMONDO2          |
| BEL-11_DTa    | <i>D. takahashi</i>  | BEL/Pao   | NINJA              |
| BEL-12_DTa    | <i>D. takahashi</i>  | BEL/Pao   | BELMONDO2          |
| BEL-13_DTa    | <i>D. takahashi</i>  | BEL/Pao   | NINJA              |
| BEL-14_DTa    | <i>D. takahashi</i>  | BEL/Pao   | BELMONDO2          |
| BEL-15_DTa    | <i>D. takahashi</i>  | BEL/Pao   | BELMONDO           |
| BEL-16_DTa    | <i>D. takahashi</i>  | BEL/Pao   | BEL                |
| BEL-17_DTa    | <i>D. takahashi</i>  | BEL/Pao   | NINJA              |
| BEL-18_DTa    | <i>D. takahashi</i>  | BEL/Pao   | NINJA              |
| BEL-19_DTa    | <i>D. takahashi</i>  | BEL/Pao   | BELMONDO           |
| BEL-2_DTa     | <i>D. takahashi</i>  | BEL/Pao   | NINJA              |
| BEL-20_DTa    | <i>D. takahashi</i>  | BEL/Pao   | BELMONDO2          |
| BEL-21_DTa    | <i>D. takahashi</i>  | BEL/Pao   | ROO/ROOA           |
| BEL-22_DTa    | <i>D. takahashi</i>  | BEL/Pao   | BATUMI / MAX       |
| BEL-3_DTa     | <i>D. takahashi</i>  | BEL/Pao   | BELMONDO2          |
| BEL-4_DTa     | <i>D. takahashi</i>  | BEL/Pao   | BELMONDO           |
| BEL-5_DTa     | <i>D. takahashi</i>  | BEL/Pao   | BELMONDO2          |
| BEL-6_DTa     | <i>D. takahashi</i>  | BEL/Pao   | NINJA              |
| BEL-7_DTa     | <i>D. takahashi</i>  | BEL/Pao   | DIVER2             |
| BEL-8_DTa     | <i>D. takahashi</i>  | BEL/Pao   | BELMONDO2          |
| BEL-9_DTa     | <i>D. takahashi</i>  | BEL/Pao   | BELMONDO2          |
| Copia-1_DTa   | <i>D. takahashi</i>  | Ty1/Copia | COPIABIS           |
| Copia-2_DTa   | <i>D. takahashi</i>  | Ty1/Copia | 1731               |
| Gypsy-1_DTa   | <i>D. takahashii</i> | Ty3/Gypsy | Group 2 – MDG3     |
| Gypsy-10_DTa  | <i>D. takahashii</i> | Ty3/Gypsy | Group 1 – OSIRIS   |

|               |                      |           |                     |
|---------------|----------------------|-----------|---------------------|
| Gypsy-11_DTa  | <i>D. takahashii</i> | Ty3/Gypsy | Group 3 – 17.6      |
| Gypsy-12_DTa  | <i>D. takahashii</i> | Ty3/Gypsy | Group 3 – 17.6      |
| Gypsy-13_DTa  | <i>D. takahashii</i> | Ty3/Gypsy | Group 2 – MICROPIA  |
| Gypsy-14_DTa  | <i>D. takahashii</i> | Ty3/Gypsy | Group 2 – MICROPIA  |
| Gypsy-15_DTa  | <i>D. takahashii</i> | Ty3/Gypsy | Group 1 – ULYSSES   |
| Gypsy-16_DTa  | <i>D. takahashii</i> | Ty3/Gypsy | Group 2 – BICA      |
| Gypsy-17_DTa  | <i>D. takahashii</i> | Ty3/Gypsy | Group 2 – BLASTOPIA |
| Gypsy-18_DTa  | <i>D. takahashii</i> | Ty3/Gypsy | Group 1 – OSVALDO   |
| Gypsy-19_DTa  | <i>D. takahashii</i> | Ty3/Gypsy | Group 1 – OSVALDO   |
| Gypsy-2_DTa   | <i>D. takahashii</i> | Ty3/Gypsy | Group 2 – MDG3      |
| Gypsy-20_DTa  | <i>D. takahashii</i> | Ty3/Gypsy | Group 1 – OSVALDO   |
| Gypsy-3_DTa   | <i>D. takahashii</i> | Ty3/Gypsy | Group 2 – BLASTOPIA |
| Gypsy-4_DTa   | <i>D. takahashii</i> | Ty3/Gypsy | Group 3 – CHIMPO    |
| Gypsy-5_DTa   | <i>D. takahashii</i> | Ty3/Gypsy | Group 1 – OSIRIS    |
| Gypsy-6_DTa   | <i>D. takahashii</i> | Ty3/Gypsy | Group 1 – OSIRIS    |
| Gypsy-7_DTa   | <i>D. takahashii</i> | Ty3/Gypsy | Group 1 – OSIRIS    |
| Gypsy-8_DTa   | <i>D. takahashii</i> | Ty3/Gypsy | Group 2 – SACCO     |
| Gypsy-9_DTa   | <i>D. takahashii</i> | Ty3/Gypsy | Group 2 – MDG3      |
| BEL-1_DVir    | <i>D. virilis</i>    | BEL/Pao   | NINJA               |
| BEL-2_DVir    | <i>D. virilis</i>    | BEL/Pao   | DIVER2              |
| BEL-3_DVir    | <i>D. virilis</i>    | BEL/Pao   | DIVER2              |
| BEL-4_DVir    | <i>D. virilis</i>    | BEL/Pao   | NINJA               |
| BEL-5_DVir    | <i>D. virilis</i>    | BEL/Pao   | DIVER2              |
| BEL1_DVir     | <i>D. virilis</i>    | BEL/Pao   | DIVER2              |
| Copia-1_Dvir  | <i>D. virilis</i>    | Ty1/Copia | Xanthias            |
| Gypsy-1_DVir  | <i>D. virilis</i>    | Ty3/Gypsy | Group 3 – 412/MDG1  |
| Gypsy-10_DVir | <i>D. virilis</i>    | Ty3/Gypsy | Group 1 – ISIS-like |
| Gypsy-11_DVir | <i>D. virilis</i>    | Ty3/Gypsy | Group 1 – ISIS      |
| Gypsy-12_DVir | <i>D. virilis</i>    | Ty3/Gypsy | Group 3 – GYPSY     |
| Gypsy-13_DVir | <i>D. virilis</i>    | Ty3/Gypsy | Group 2 – BICA      |
| Gypsy-2_DVir  | <i>D. virilis</i>    | Ty3/Gypsy | Group 1 – ISIS-like |
| Gypsy-3_DVir  | <i>D. virilis</i>    | Ty3/Gypsy | Group 3 – GYPSY     |
| Gypsy-4_DVir  | <i>D. virilis</i>    | Ty3/Gypsy | Group 2 – BLASTOPIA |
| Gypsy-5_DVir  | <i>D. virilis</i>    | Ty3/Gypsy | Group 3 – 17.6      |
| Gypsy-6_DVir  | <i>D. virilis</i>    | Ty3/Gypsy | Group 2 – BLASTOPIA |
| Gypsy-7_DVir  | <i>D. virilis</i>    | Ty3/Gypsy | Group 3 – 412/MDG1  |
| Gypsy-8_DVir  | <i>D. virilis</i>    | Ty3/Gypsy | Group 2 – MICROPIA  |
| Gypsy-9_DVir  | <i>D. virilis</i>    | Ty3/Gypsy | Group 2 – MICROPIA  |
| Gypsy1_DV     | <i>D. virilis</i>    | Ty3/Gypsy | Group 2 – MDG3      |
| Gypsy2_DV     | <i>D. virilis</i>    | Ty3/Gypsy | Group 2 – MICROPIA  |
| Gypsy3_DV     | <i>D. virilis</i>    | Ty3/Gypsy | Group 1 – OSVALDO   |
| TV1_Dvir      | <i>D. virilis</i>    | Ty3/Gypsy | Group 3 – 17.6      |

|                |                      |           |                     |
|----------------|----------------------|-----------|---------------------|
| ULYSSES_Dvir   | <i>D. virilis</i>    | Ty3/Gypsy | Group 1 – ULYSSES   |
| BEL-1_DWil     | <i>D. willistoni</i> | BEL/Pao   | BATUMI / MAX        |
| BEL-10_DWil    | <i>D. willistoni</i> | BEL/Pao   | BATUMI / MAX        |
| BEL-11_DWil    | <i>D. willistoni</i> | BEL/Pao   | NINJA               |
| BEL-12_DWil    | <i>D. willistoni</i> | BEL/Pao   | NINJA               |
| BEL-13_DWil    | <i>D. willistoni</i> | BEL/Pao   | BEL                 |
| BEL-14_DWil    | <i>D. willistoni</i> | BEL/Pao   | BEL                 |
| BEL-15_DWil    | <i>D. willistoni</i> | BEL/Pao   | NINJA               |
| BEL-16_DWil    | <i>D. willistoni</i> | BEL/Pao   | BEL                 |
| BEL-18_DWil    | <i>D. willistoni</i> | BEL/Pao   | BELMONDO2           |
| BEL-19_DWil    | <i>D. willistoni</i> | BEL/Pao   | NINJA               |
| BEL-2_DWil     | <i>D. willistoni</i> | BEL/Pao   | NINJA               |
| BEL-20_DWil    | <i>D. willistoni</i> | BEL/Pao   | NINJA               |
| BEL-21_DWil    | <i>D. willistoni</i> | BEL/Pao   | BATUMI / MAX        |
| BEL-3_DWil     | <i>D. willistoni</i> | BEL/Pao   | BEL                 |
| BEL-4_DWil     | <i>D. willistoni</i> | BEL/Pao   | DIVER               |
| BEL-5_DWil     | <i>D. willistoni</i> | BEL/Pao   | NINJA               |
| BEL-6_DWil     | <i>D. willistoni</i> | BEL/Pao   | ROO/ROOA            |
| BEL-7_DWil     | <i>D. willistoni</i> | BEL/Pao   | NINJA               |
| BEL-8_DWil     | <i>D. willistoni</i> | BEL/Pao   | NINJA               |
| BEL-9_DWil     | <i>D. willistoni</i> | BEL/Pao   | BELMONDO2           |
| Copia-1_DWil   | <i>D. willistoni</i> | Ty1/Copia | 1731                |
| Copia-2_DWil   | <i>D. willistoni</i> | Ty1/Copia | 1731                |
| Copia-3_DWil   | <i>D. willistoni</i> | Ty1/Copia | 1731                |
| Copia-4_DWil   | <i>D. willistoni</i> | Ty1/Copia | COPIA2/COPIA2_bis   |
| Copia-5_DWil   | <i>D. willistoni</i> | Ty1/Copia | COPIA               |
| Copia-6_DWil   | <i>D. willistoni</i> | Ty1/Copia | COPIABIS            |
| Copia-7_DWil   | <i>D. willistoni</i> | Ty1/Copia | outsider            |
| Copia-8_DWil   | <i>D. willistoni</i> | Ty1/Copia | COPIA               |
| Copia-9_DWil   | <i>D. willistoni</i> | Ty1/Copia | COPIABIS            |
| Gypsy-1_DWil   | <i>D. willistoni</i> | Ty3/Gypsy | Group 1 – OSVALDO   |
| Gypsy-10_DWil  | <i>D. willistoni</i> | Ty3/Gypsy | Group 2 – BLASTOPIA |
| Gypsy-11_DWil  | <i>D. willistoni</i> | Ty3/Gypsy | Group 2 – BICA      |
| Gypsy-12_DWil  | <i>D. willistoni</i> | Ty3/Gypsy | Group 2 – MDG3      |
| Gypsy-13_DWil  | <i>D. willistoni</i> | Ty3/Gypsy | Group 1             |
| Gypsy-14_DWil  | <i>D. willistoni</i> | Ty3/Gypsy | Group 3 – GYPSY     |
| Gypsy-14B_DWil | <i>D. willistoni</i> | Ty3/Gypsy | ? (no pol)          |
| Gypsy-15_DWil  | <i>D. willistoni</i> | Ty3/Gypsy | Group 3 – GYPSY     |
| Gypsy-16_DWil  | <i>D. willistoni</i> | Ty3/Gypsy | Group 2 – MDG3      |
| Gypsy-17_DWil  | <i>D. willistoni</i> | Ty3/Gypsy | Group 2 – MDG3      |
| Gypsy-18_DWil  | <i>D. willistoni</i> | Ty3/Gypsy | Group 1 – ISIS      |
| Gypsy-19_DWil  | <i>D. willistoni</i> | Ty3/Gypsy | Group 2 – BLASTOPIA |

|               |                      |           |                     |
|---------------|----------------------|-----------|---------------------|
| Gypsy-2_DWil  | <i>D. willistoni</i> | Ty3/Gypsy | Group 1 – OSIRIS    |
| Gypsy-20_DWil | <i>D. willistoni</i> | Ty3/Gypsy | Group 3 – GYPSY     |
| Gypsy-21_DWil | <i>D. willistoni</i> | Ty3/Gypsy | Group 2 – BLASTOPIA |
| Gypsy-22_DWil | <i>D. willistoni</i> | Ty3/Gypsy | Group 3 – 17.6      |
| Gypsy-23_DWil | <i>D. willistoni</i> | Ty3/Gypsy | Group 3 – 412/MDG1  |
| Gypsy-24_DWil | <i>D. willistoni</i> | Ty3/Gypsy | Group 2 – SACCO     |
| Gypsy-25_DWil | <i>D. willistoni</i> | Ty3/Gypsy | Group 2 – BLASTOPIA |
| Gypsy-26_DWil | <i>D. willistoni</i> | Ty3/Gypsy | Group 2 – SACCO     |
| Gypsy-27_DWil | <i>D. willistoni</i> | Ty3/Gypsy | Group 3 – GYPSY     |
| Gypsy-28_DWil | <i>D. willistoni</i> | Ty3/Gypsy | Group 2 – BLASTOPIA |
| Gypsy-29_DWil | <i>D. willistoni</i> | Ty3/Gypsy | Group 3 – 17.6      |
| Gypsy-3_DWil  | <i>D. willistoni</i> | Ty3/Gypsy | Group 2 – BLASTOPIA |
| Gypsy-30_DWil | <i>D. willistoni</i> | Ty3/Gypsy | Group 2 – MICROPIA  |
| Gypsy-31_DWil | <i>D. willistoni</i> | Ty3/Gypsy | Group 2 – SACCO     |
| Gypsy-32_DWil | <i>D. willistoni</i> | Ty3/Gypsy | Group 2 – BLASTOPIA |
| Gypsy-33_DWil | <i>D. willistoni</i> | Ty3/Gypsy | Group 2 – BLASTOPIA |
| Gypsy-34_DWil | <i>D. willistoni</i> | Ty3/Gypsy | Group 1 – ISIS      |
| Gypsy-35_DWil | <i>D. willistoni</i> | Ty3/Gypsy | Group 1 – ULYSSES   |
| Gypsy-36_DWil | <i>D. willistoni</i> | Ty3/Gypsy | Group 2 – MDG3      |
| Gypsy-37_DWil | <i>D. willistoni</i> | Ty3/Gypsy | Group 1 – OSIRIS    |
| Gypsy-38_DWil | <i>D. willistoni</i> | Ty3/Gypsy | Group 2 – BLASTOPIA |
| Gypsy-4_DWil  | <i>D. willistoni</i> | Ty3/Gypsy | Group 2 – BLASTOPIA |
| Gypsy-42_DWil | <i>D. willistoni</i> | Ty3/Gypsy | Group 2 – BLASTOPIA |
| Gypsy-43_DWil | <i>D. willistoni</i> | Ty3/Gypsy | Group 2 – SACCO     |
| Gypsy-44_DWil | <i>D. willistoni</i> | Ty3/Gypsy | Group 3 – GYPSY     |
| Gypsy-45_DWil | <i>D. willistoni</i> | Ty3/Gypsy | Group 2 – SACCO     |
| Gypsy-46_DWil | <i>D. willistoni</i> | Ty3/Gypsy | Group 2 – MICROPIA  |
| Gypsy-47_DWil | <i>D. willistoni</i> | Ty3/Gypsy | Group 1 – OSIRIS    |
| Gypsy-48_DWil | <i>D. willistoni</i> | Ty3/Gypsy | Group 1 – ULYSSES   |
| Gypsy-49_DWil | <i>D. willistoni</i> | Ty3/Gypsy | Group 2 – MICROPIA  |
| Gypsy-5_DWil  | <i>D. willistoni</i> | Ty3/Gypsy | Group 3 – 412/MDG1  |
| Gypsy-50_DWil | <i>D. willistoni</i> | Ty3/Gypsy | Group 3 – 412/MDG1  |
| Gypsy-51_DWil | <i>D. willistoni</i> | Ty3/Gypsy | Group 2 – BLASTOPIA |
| Gypsy-52_DWil | <i>D. willistoni</i> | Ty3/Gypsy | Group 1 – ISIS      |
| Gypsy-53_DWil | <i>D. willistoni</i> | Ty3/Gypsy | Group 2 – MDG3      |
| Gypsy-54_DWil | <i>D. willistoni</i> | Ty3/Gypsy | Group 1 – ISIS-like |
| Gypsy-55_DWil | <i>D. willistoni</i> | Ty3/Gypsy | Group 2 – BLASTOPIA |
| Gypsy-56_DWil | <i>D. willistoni</i> | Ty3/Gypsy | Group 2 – BICA      |
| Gypsy-57_DWil | <i>D. willistoni</i> | Ty3/Gypsy | Group 3 – 412/MDG1  |
| Gypsy-58_DWil | <i>D. willistoni</i> | Ty3/Gypsy | Group 2 – BLASTOPIA |
| Gypsy-59_DWil | <i>D. willistoni</i> | Ty3/Gypsy | Group 2 – MDG3      |
| Gypsy-6_DWil  | <i>D. willistoni</i> | Ty3/Gypsy | Group 2 – MDG3      |

|                                |                      |           |                     |
|--------------------------------|----------------------|-----------|---------------------|
| Gypsy-60_DWil                  | <i>D. willistoni</i> | Ty3/Gypsy | Group 3 – 17.6      |
| Gypsy-61_DWil                  | <i>D. willistoni</i> | Ty3/Gypsy | Group 1 – OSVALDO   |
| Gypsy-62_DWil                  | <i>D. willistoni</i> | Ty3/Gypsy | Group 3 – 412/MDG1  |
| Gypsy-63_DWil                  | <i>D. willistoni</i> | Ty3/Gypsy | Group 3 – GYPSY     |
| Gypsy-64_DWil                  | <i>D. willistoni</i> | Ty3/Gypsy | Group 2 – BLASTOPIA |
| Gypsy-7_DWil                   | <i>D. willistoni</i> | Ty3/Gypsy | Group 2 – BLASTOPIA |
| Gypsy-8_DWil                   | <i>D. willistoni</i> | Ty3/Gypsy | Group 2 – BLASTOPIA |
| Gypsy-9_DWil                   | <i>D. willistoni</i> | Ty3/Gypsy | Group 2 – SACCO     |
| BEL-3_DYa                      | <i>D. yakuba</i>     | BEL/Pao   | BELMONDO2           |
| BEL-4_DYa                      | <i>D. yakuba</i>     | BEL/Pao   | BELMONDO2           |
| BEL-5_DYa                      | <i>D. yakuba</i>     | BEL/Pao   | BELMONDO2           |
| BEL-6_DYa                      | <i>D. yakuba</i>     | BEL/Pao   | DIVER2              |
| BEL1_Dya                       | <i>D. yakuba</i>     | BEL/Pao   | BATUMI / MAX        |
| BEL2_DYa                       | <i>D. yakuba</i>     | BEL/Pao   | BATUMI / MAX        |
| Copia-1_Dya = New_Xanthias_Dya | <i>D. yakuba</i>     | Ty1/Copia | new Xanthias        |
| Copia-1-DY                     | <i>D. yakuba</i>     | Ty1/Copia | 1731                |
| Copia-2_DYa                    | <i>D. yakuba</i>     | Ty1/Copia | COPIA               |
| Gypsy_6B_Dya                   | <i>D. yakuba</i>     | Ty3/Gypsy | Group 3 – GYPSY     |
| Gypsy-21_DY                    | <i>D. yakuba</i>     | Ty3/Gypsy | Group 1 – OSVALDO   |
| Gypsy-21_DYa                   | <i>D. yakuba</i>     | Ty3/Gypsy | Group 2 – MDG3      |
| Gypsy-22_DY                    | <i>D. yakuba</i>     | Ty3/Gypsy | Group 1 – OSIRIS    |
| Gypsy-22_DYa                   | <i>D. yakuba</i>     | Ty3/Gypsy | Group 2 – MICROPIA  |
| Gypsy-23_DY                    | <i>D. yakuba</i>     | Ty3/Gypsy | Group 1 – OSIRIS    |
| Gypsy-23_DYa                   | <i>D. yakuba</i>     | Ty3/Gypsy | Group 2 – MICROPIA  |
| Gypsy-24_DY                    | <i>D. yakuba</i>     | Ty3/Gypsy | Group 3 – GYPSY     |
| Gypsy-24_DYa                   | <i>D. yakuba</i>     | Ty3/Gypsy | Group 2 – SACCO     |
| Gypsy-25_DYa                   | <i>D. yakuba</i>     | Ty3/Gypsy | Group 2 – MDG3      |
| Gypsy-26_DYa                   | <i>D. yakuba</i>     | Ty3/Gypsy | Group 1 – OSVALDO   |
| Gypsy-27_DYa                   | <i>D. yakuba</i>     | Ty3/Gypsy | Group 2 – MDG3      |
| Gypsy-28_DYa                   | <i>D. yakuba</i>     | Ty3/Gypsy | Group 3 – 17.6      |
| Gypsy-29_DYa                   | <i>D. yakuba</i>     | Ty3/Gypsy | Group 2 – BICA      |
| Gypsy-30_DYa                   | <i>D. yakuba</i>     | Ty3/Gypsy | Group 1 – ULYSSES   |
| Gypsy-31_DYa                   | <i>D. yakuba</i>     | Ty3/Gypsy | Group 3 – 17.6      |
| Gypsy-32_DYa                   | <i>D. yakuba</i>     | Ty3/Gypsy | Group 1 – OSIRIS    |
| Gypsy1_Dya                     | <i>D. yakuba</i>     | Ty3/Gypsy | Group 2 – BLASTOPIA |
| Gypsy10_Dya                    | <i>D. yakuba</i>     | Ty3/Gypsy | Group 1 – OSIRIS    |
| Gypsy11_Dya                    | <i>D. yakuba</i>     | Ty3/Gypsy | Group 3 – GYPSY     |
| Gypsy12_Dya                    | <i>D. yakuba</i>     | Ty3/Gypsy | Group 2 – BLASTOPIA |
| Gypsy13_Dya                    | <i>D. yakuba</i>     | Ty3/Gypsy | Group 1 – ISIS      |
| Gypsy14_Dya                    | <i>D. yakuba</i>     | Ty3/Gypsy | Group 2 – BLASTOPIA |
| Gypsy15_Dya                    | <i>D. yakuba</i>     | Ty3/Gypsy | Group 2 – MDG3      |
| Gypsy16_Dya                    | <i>D. yakuba</i>     | Ty3/Gypsy | Group 3 – GYPSY     |



|             |                  |           |                     |
|-------------|------------------|-----------|---------------------|
| Gypsy17_Dya | <i>D. yakuba</i> | Ty3/Gypsy | Group 2 – SACCO     |
| Gypsy18_Dya | <i>D. yakuba</i> | Ty3/Gypsy | Group 1 – OSIRIS    |
| Gypsy19_Dya | <i>D. yakuba</i> | Ty3/Gypsy | Group 2 – MDG3      |
| Gypsy2_Dya  | <i>D. yakuba</i> | Ty3/Gypsy | Group 2 – BLASTOPIA |
| Gypsy20_Dya | <i>D. yakuba</i> | Ty3/Gypsy | Group 3 – 17.6      |
| Gypsy3_Dya  | <i>D. yakuba</i> | Ty3/Gypsy | Group 3             |
| Gypsy4_Dya  | <i>D. yakuba</i> | Ty3/Gypsy | Group 1 – OSVALDO   |
| Gypsy5_Dya  | <i>D. yakuba</i> | Ty3/Gypsy | Group 1 – ISIS-like |
| Gypsy6_Dya  | <i>D. yakuba</i> | Ty3/Gypsy | Group 1 – ISIS      |
| Gypsy7_Dya  | <i>D. yakuba</i> | Ty3/Gypsy | Group 2 – SACCO     |
| Gypsy8_Dya  | <i>D. yakuba</i> | Ty3/Gypsy | Group 3 – 17.6      |
| Gypsy9_Dya  | <i>D. yakuba</i> | Ty3/Gypsy | Group 2 – MICROPIA  |
| Pifo_Dyak   | <i>D. yakuba</i> | Ty3/Gypsy | Group 3 – 17.6      |
