# Supplementary material for: Evolutionary history of LTR-retrotransposons among 20 Drosophila species
Source: PubMed Central journal article supplement (PMC5408442; doi:10.1186/s13100-017-0090-3), 2017-04-27
Supplement: 13100_2017_90_MOESM4_ESM.pdf [file 13100_2017_90_MOESM4_ESM.pdf]

**A) Ty1/Copia**

|              | <i>D. melanogaster</i> | <i>D. simulans</i> | <i>D. sechellia</i> | <i>D. erecta</i> | <i>D. yakuba</i> |
|--------------|------------------------|--------------------|---------------------|------------------|------------------|
| 1731         | Black                  | Black              | Black               | White            | White            |
| COPIA        | Black                  | Black              | Black               | White            | Gray             |
| Copia-1_DY   | Gray                   | Gray               | Gray                | White            | Black            |
| COPIA2       | Black                  | Black              | Black               | White            | Gray             |
| Copia-2_Dya  | Gray                   | Gray               | Gray                | White            | Black            |
| COPIA2bis    | Black                  | Black              | Black               | White            | White            |
| FROGGER      | Black                  | Gray               | Gray                | White            | White            |
| new_Xanthias | Black                  | Black              | Black               | White            | Black            |
| Xanthias     | Black                  | Black              | Black               | White            | Black            |

**Supplementary figure S2:** pattern of presence (black), absence (white) or traces (gray) of a given TE in the species of the *melanogaster* subgroup for A) Ty1/Copia, B) BEL/Pao, and C) Ty3/Gypsy superfamilies

**B) BEL/Pao**

|           | <i>D. melanogaster</i> | <i>D. simulans</i> | <i>D. sechellia</i> | <i>D. erecta</i> | <i>D. yakuba</i> |
|-----------|------------------------|--------------------|---------------------|------------------|------------------|
| BATUMI    |                        |                    |                     |                  |                  |
| BEL       |                        |                    |                     |                  |                  |
| BEL-2_Dse |                        |                    |                     |                  |                  |
| BEL-3_Dya |                        |                    |                     |                  |                  |
| BEL-4_Dya |                        |                    |                     |                  |                  |
| BEL-5_Dya |                        |                    |                     |                  |                  |
| BEL1_Dya  |                        |                    |                     |                  |                  |
| BEL2_Dya  |                        |                    |                     |                  |                  |
| DIVER     |                        |                    |                     |                  |                  |
| DIVER2    |                        |                    |                     |                  |                  |
| MAX       |                        |                    |                     |                  |                  |
| Ninja     |                        |                    |                     |                  |                  |
| ROO       |                        |                    |                     |                  |                  |

**C) Ty3/Gypsy  
group 1 "OSVALDO/ULYSSES"**

|           |              | <i>D. melanogaster</i> | <i>D. simulans</i> | <i>D. sechellia</i> | <i>D. erecta</i> | <i>D. yakuba</i> |
|-----------|--------------|------------------------|--------------------|---------------------|------------------|------------------|
| ISIS      | Gypsy13_Dya  |                        |                    |                     |                  |                  |
| ISIS      | Gypsy6_Dya   |                        |                    |                     |                  |                  |
| ISIS-like | Gypsy31_Dya  |                        |                    |                     |                  |                  |
| ISIS-like | Gypsy5_Dya   |                        |                    |                     |                  |                  |
| ISIS-like | Isislike_Dya |                        |                    |                     |                  |                  |
| OSIRIS    | Gypsy-22_DY  |                        |                    |                     |                  |                  |
| OSIRIS    | Gypsy-23_DY  |                        |                    |                     |                  |                  |
| OSIRIS    | Gypsy-32_Dya |                        |                    |                     |                  |                  |
| OSIRIS    | Gypsy10_Dya  |                        |                    |                     |                  |                  |
| OSIRIS    | GYPY12       |                        |                    |                     |                  |                  |
| OSIRIS    | Gypsy18_Dya  |                        |                    |                     |                  |                  |
| OSVALDO   | Gypsy-21_DY  |                        |                    |                     |                  |                  |
| OSVALDO   | Gypsy-26_Dya |                        |                    |                     |                  |                  |
| OSVALDO   | Gypsy4_Dya   |                        |                    |                     |                  |                  |
| ULYSSES   | Gypsy-30_Dya |                        |                    |                     |                  |                  |

**group 2 "MICROPIA/SACCO"**

|           |              | <i>D. melanogaster</i> | <i>D. simulans</i> | <i>D. sechellia</i> | <i>D. erecta</i> | <i>D. yakuba</i> |
|-----------|--------------|------------------------|--------------------|---------------------|------------------|------------------|
| BICA      | Bica         |                        |                    |                     |                  |                  |
| BICA      | Gypsy-29_Dya |                        |                    |                     |                  |                  |
| BLASTOPIA | BLASTOPIA    |                        |                    |                     |                  |                  |
| BLASTOPIA | Gypsy1_Dya   |                        |                    |                     |                  |                  |
| BLASTOPIA | Gypsy12_Dya  |                        |                    |                     |                  |                  |
| BLASTOPIA | Gypsy14_Dya  |                        |                    |                     |                  |                  |
| BLASTOPIA | Gypsy2_Dya   |                        |                    |                     |                  |                  |
| BLASTOPIA | Gypsy-6_Dse  |                        |                    |                     |                  |                  |
| MICROPIA  | Gypsy-2_Dsim |                        |                    |                     |                  |                  |
| MICROPIA  | Gypsy-22_Dya |                        |                    |                     |                  |                  |
| MICROPIA  | Gypsy-23_Dya |                        |                    |                     |                  |                  |
| MICROPIA  | Gypsy-4_Dse  |                        |                    |                     |                  |                  |
| MICROPIA  | Gypsy9_Dya   |                        |                    |                     |                  |                  |
| MICROPIA  | INVADER1     |                        |                    |                     |                  |                  |
| MICROPIA  | INVADER6     |                        |                    |                     |                  |                  |
| MICROPIA  | MICROPIA     |                        |                    |                     |                  |                  |
| MDG3      | Gypsy-21_Dya |                        |                    |                     |                  |                  |
| MDG3      | Gypsy-25_Dya |                        |                    |                     |                  |                  |
| MDG3      | Gypsy-27_Dya |                        |                    |                     |                  |                  |
| MDG3      | Gypsy15_Dya  |                        |                    |                     |                  |                  |
| MDG3      | Gypsy19_Dya  |                        |                    |                     |                  |                  |
| MDG3      | INVADER2     |                        |                    |                     |                  |                  |
| MDG3      | INVADER3     |                        |                    |                     |                  |                  |
| MDG3      | MDG3         |                        |                    |                     |                  |                  |
| SACCO     | Gypsy7_Dya   |                        |                    |                     |                  |                  |
| SACCO     | Gypsy17_Dya  |                        |                    |                     |                  |                  |
| SACCO     | Sacco        |                        |                    |                     |                  |                  |
| SACCO     | Saccobis     |                        |                    |                     |                  |                  |

**Group 3 errantiviridae/412**

|      |              | <i>D. melanogaster</i> | <i>D. simulans</i> | <i>D. sechellia</i> | <i>D. erecta</i> | <i>D. yakuba</i> |
|------|--------------|------------------------|--------------------|---------------------|------------------|------------------|
| 17.6 | 17.6         |                        |                    |                     |                  |                  |
| 17.6 | ACCORD       |                        |                    |                     |                  |                  |
| 17.6 | ACCORD2      |                        |                    |                     |                  |                  |
| 17.6 | DM297        |                        |                    |                     |                  |                  |
| 17.6 | Gypsy-28_Dya |                        |                    |                     |                  |                  |
| 17.6 | Gypsy-31_Dya |                        |                    |                     |                  |                  |
| 17.6 | Gypsy-4_Dsim |                        |                    |                     |                  |                  |
| 17.6 | Gypsy-5_Dse  |                        |                    |                     |                  |                  |
| 17.6 | GYPY5        |                        |                    |                     |                  |                  |
| 17.6 | Gypsy8_Dya   |                        |                    |                     |                  |                  |
| 17.6 | Pifo         |                        |                    |                     |                  |                  |
| 17.6 | QUASIMODO    |                        |                    |                     |                  |                  |
| 17.6 | QUASIMODO2   |                        |                    |                     |                  |                  |
| 17.6 | ROVER        |                        |                    |                     |                  |                  |
| 17.6 | TirantC      |                        |                    |                     |                  |                  |

|          |               |  |  |  |
|----------|---------------|--|--|--|
| 17.6     | TRANSPAC      |  |  |  |
| 17.6     | ZAM           |  |  |  |
| ?        | Gypsy3_Dya    |  |  |  |
| 412/MDG1 | blood         |  |  |  |
| 412/MDG1 | Gypsy-8_Dsim  |  |  |  |
| 412/MDG1 | MDG1          |  |  |  |
| 412/MDG1 | STALKER2      |  |  |  |
| 412/MDG1 | STALKER4      |  |  |  |
| 412/MDG1 | TABOR         |  |  |  |
| CHIMPO   | Chimpo        |  |  |  |
| GYPSY    | BURDOCK       |  |  |  |
| GYPSY    | Chouto        |  |  |  |
| GYPSY    | GTWIN         |  |  |  |
| GYPSY    | GYPSY         |  |  |  |
| GYPSY    | gypsy-1_Dse   |  |  |  |
| GYPSY    | Gypsy-1_Dsim  |  |  |  |
| GYPSY    | Gypsy-10_Dsim |  |  |  |
| GYPSY    | Gypsy-11_Dsim |  |  |  |
| GYPSY    | Gypsy11_Dya   |  |  |  |
| GYPSY    | GYPSY2        |  |  |  |
| GYPSY    | GYPSY3        |  |  |  |
| GYPSY    | Gypsy-1A_DSe  |  |  |  |
| GYPSY    | GYPSY4        |  |  |  |
| GYPSY    | GYPSY6        |  |  |  |
| GYPSY    | HMSBEAGLE     |  |  |  |
| GYPSY    | nomad         |  |  |  |
