# Supplementary material for: Evolutionary history of LTR-retrotransposons among 20 Drosophila species
Source: PubMed Central journal article supplement (PMC5408442; doi:10.1186/s13100-017-0090-3), 2017-04-27

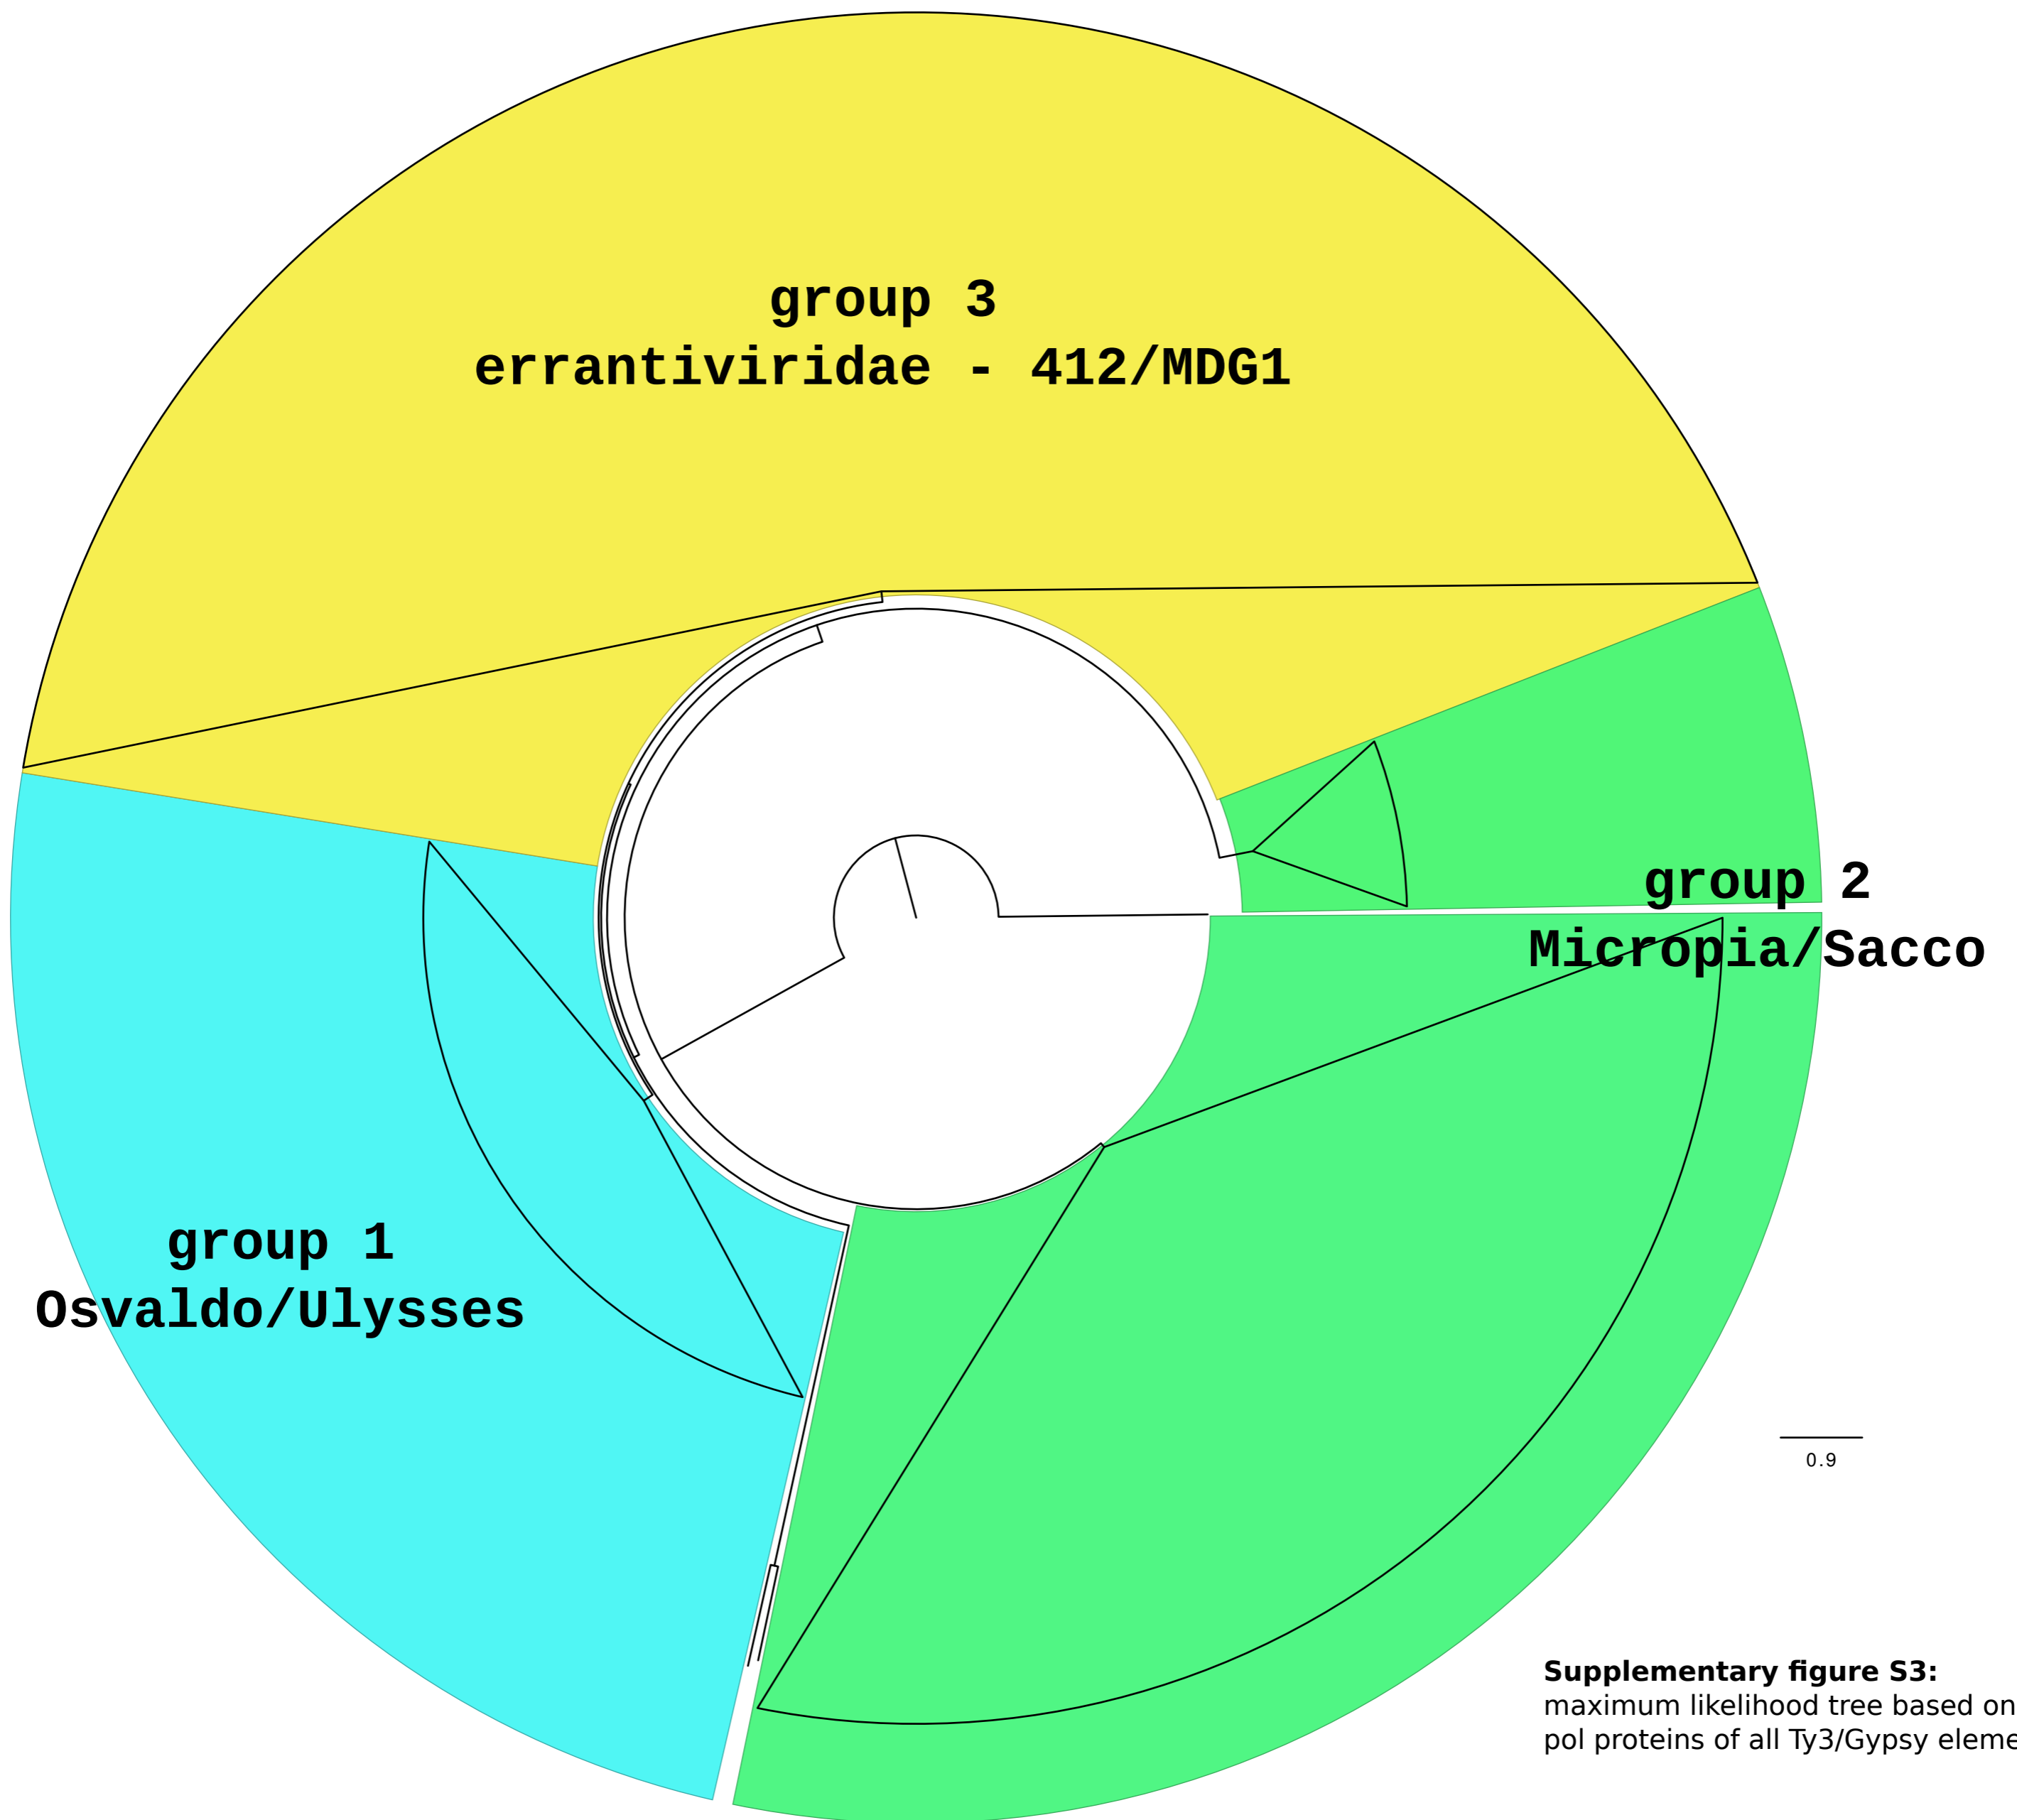

Supplement: 13100_2017_90_MOESM5_ESM.pdf [file 13100_2017_90_MOESM5_ESM.pdf]
