# Supplementary material for: Evolutionary history of LTR-retrotransposons among 20 Drosophila species
Source: PubMed Central journal article supplement (PMC5408442; doi:10.1186/s13100-017-0090-3), 2017-04-27
Supplement: 13100_2017_90_MOESM6_ESM.pdf [file 13100_2017_90_MOESM6_ESM.pdf]

**Supplementary Table S2:** Single copy orthologous genes from the *Drosophila* genomes used in the dS estimate in the VHICA method.

| Single Copy Orthologous Host Gene | Full name                                   | Flybase Name |
|-----------------------------------|---------------------------------------------|--------------|
| abd-A                             | abdominal A                                 | FBgn0000014  |
| Abl                               | Abl tyrosine kinase                         | FBgn0000017  |
| nAChR $\beta$ 1                   | nicotinic Acetylcholine Receptor $\beta$ 1  | FBgn0000038  |
| al                                | aristaless                                  | FBgn0000061  |
| bib                               | big brain                                   | FBgn0000180  |
| bur                               | burgundy                                    | FBgn0000239  |
| D                                 | Dichaete                                    | FBgn0000411  |
| Ddc                               | dopa decarboxylase                          | FBgn0000422  |
| dib                               | disembodied                                 | FBgn0000449  |
| E(z)                              | Enhancer of zeste                           | FBgn0000629  |
| grau                              | grauzone                                    | FBgn0001133  |
| bap                               | bagpipe                                     | FBgn0004862  |
| DNApol- $\alpha$ 73               | DNA polymerase $\alpha$ 73kD                | FBgn0005696  |
| Nap1                              | Nucleosome assembly protein 1               | FBgn0015268  |
| CG5861                            | CG5861                                      | FBgn0015338  |
| RpS21                             | Ribosomal protein S21                       | FBgn0015521  |
| AstA                              | Allatostatin A                              | FBgn0015591  |
| Lis-1                             | Lissencephaly-1                             | FBgn0015754  |
| EloB                              | Elongin B                                   | FBgn0023212  |
| Lim1                              | Lim1                                        | FBgn0026411  |
| Rab35                             | Rab35                                       | FBgn0031090  |
| CG9586                            | CG9586                                      | FBgn0032101  |
| Vps20                             | Vacuolar protein sorting 20                 | FBgn0034744  |
| Art7                              | Arginine methyltransferase 7                | FBgn0034817  |
| Vdup1                             | Vitamin D3 up-regulated protein 1           | FBgn0035103  |
| pyx                               | pyrexia                                     | FBgn0035113  |
| cln3                              | cln3                                        | FBgn0036756  |
| Usp12-46                          | Ubiquitin-specific protease 12/46 ortholog  | FBgn0039025  |
| bc10                              | bc10                                        | FBgn0040239  |
| Gclc                              | Glutamate-cysteine ligase catalytic subunit | FBgn0040319  |
